# Supplementary material
Source: PubMed Central journal article supplement (PMC3918485)

# **CHEMISTRY**

---

## **A EUROPEAN JOURNAL**

---

### Supporting Information

© Copyright Wiley-VCH Verlag GmbH & Co. KGaA, 69451 Weinheim, 2013

#### **Rapid and Specific Post-Synthesis Modification of DNA through a Biocompatible Condensation of 1,2-Aminothiols with 2-Cyanobenzothiazole**

**Yunfeng Cheng, Hanjing Peng, Weixuan Chen, Nanting Ni, Bowen Ke,  
Chaofeng Dai,\* and Binghe Wang\*<sup>[a]</sup>**

chem\_201201677\_sm\_miscellaneous\_information.pdf

# **A Novel Method for the Rapid and Specific Post-synthesis Modification of DNA via a Bio-orthogonal Condensation of 1,2-Aminothiols with 2-Cyanobenzothiazole †**

Yunfeng Cheng,<sup>‡</sup> Hanjing Peng,<sup>‡</sup> Weixuan Chen, Nanting Ni, Bowen Ke, Chaofeng Dai,<sup>\*</sup>  
and Binghe Wang<sup>\*</sup>

*Department of Chemistry, Center for Diagnostics and Therapeutics, and Center for Biotechnology and Drug Design, Georgia State University, P.O. Box 4098, Atlanta, GA, USA 30302-4098, Fax: (+1) 404-413-5543; Tel: (+1) 404-413-5545; E-mail:*

*[wang@gsu.edu](mailto:wang@gsu.edu); [cdai@gsu.edu](mailto:cdai@gsu.edu)*

*‡ Dr. Y. Cheng and Dr. H. Peng contributed equally to this work*

## **Supporting Information**

### **Table of contents**

1. General Information
2. Experimental Procedure for the Synthesis of CBT-TTP
3. Experimental Procedure for the Synthesis of Cys-BA
4. Kinetic Study for the Reaction of CBT-T and 1,2-aminothiol (L-cysteine)
5. MALDI-TOF spectra of DNA products
6. Thermodenaturation of duplex DNAs
7. NMR spectrum of synthesized compounds

### **1. General Information**

Solvents and reagents were purchased from VWR International, Oakwood Product Inc., or Sigma-Aldrich Co. and used without purification unless specified otherwise. When necessary, solid reagents were dried under high vacuum. Reactions with compounds sensitive to air or moisture were performed under argon. Solvent mixtures are indicated as volume/volume ratios. Thin layer chromatography (TLC) was run on Sorbtech

W/UV254 plates (0.25 mm thick), and visualized under UV-light or by a Ce-Mo staining solution (phosphomolybdate, 25 g; Ce(SO<sub>4</sub>)<sub>2</sub>·4H<sub>2</sub>O, 10 g; conc. H<sub>2</sub>SO<sub>4</sub>, 60 mL; H<sub>2</sub>O, 940 mL) with heating. Flash chromatography was performed using Fluka silica gel 60 (mesh size: 0.040-0.063 mm) using a weight ratio of ca. 30:1 for silica gel over crude compound. <sup>1</sup>H, <sup>13</sup>C, and <sup>31</sup>P-NMR spectra were recorded on a Bruker 400 spectrometer (400, 100, and 166 MHz, respectively) in deuterated chloroform (CDCl<sub>3</sub>), methanol-*d*<sub>4</sub> (CD<sub>3</sub>OD), and DMSO-*d*<sub>6</sub> with either tetramethylsilane (TMS) (0.00 ppm) or the NMR solvent as the internal reference. HPLC purification for CBT-TTP was carried out using a Shimadzu LC-10AT VP system with a Zobax C18 reversed-phase column (9.4 mm × 25 cm). The sample was eluted (6 mL/min) with buffer A (20 mM triethylammonium acetate, pH 6.9-7.1) and buffer B (50% acetonitrile, 20 mM triethyl ammonium acetate) with the following: 0 min 0% B; 20 min 20% B; 30 min 100% B; 38 min 100% B; 40 min 0% B; and 45 min 0% B.

DNA primers and templates were purchased from Integrated DNA Technologies. Klenow fragment (3'-5' exo), *Taq*. DNA polymerase, and Deep Vent<sub>R</sub> (exo-) DNA polymerase were purchased from New England Biolabs. KOD-XL DNA polymerase was purchased from Novagen, Darmstadt. Reaction buffers were used as provided.

## 2. Experimental Procedure for the Synthesis of CBT-TTP

Ethyl 6-(prop-2-ynoxy)benzo[d]thiazole-2-carboxylate **6**

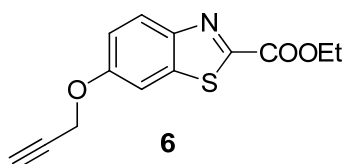

To a solution of **5** (2.23 g, 10 mmol) in DMF (30 mL) was added K<sub>2</sub>CO<sub>3</sub> (2.70 g, 20 mmol) and the mixture was stirred at RT for 30 min. After addition of propargyl bromide (80% in toluene, 3.7 mL, 20 mmol), the reaction mixture was stirred at RT for 12 h before diluting with EtOAc (300 mL). Then the mixture was washed with water (50 mL × 3) and brine (50 mL), and dried over Na<sub>2</sub>SO<sub>4</sub>. Solvent evaporation followed by flash chromatography (Hex: EA, 4:1) gave a yellow solid (2.35 g, 90% yield). <sup>1</sup>H NMR (CDCl<sub>3</sub>): 8.14 (d, *J* = 9.1 Hz, 1H), 7.49 (d, *J* = 2.3 Hz, 1H), 7.24 (dd, *J* = 2.3, 9.1 Hz, 1H), 4.80 (s, 2H), 4.55 (q, *J* = 8.7 Hz, 2H), 2.58 (s, 1H), 1.48 (t, *J* = 8.7 Hz); <sup>13</sup>C NMR (CDCl<sub>3</sub>):

160.7, 157.4, 156.4, 148.3, 138.4, 126.3, 117.9, 105.1, 63.0, 56.4, 14.3. HRMS (ESI) for  $C_{13}H_{12}NO_3S$   $[M+H]^+$  Calcd. 262.0545, Found 262.0544.

6-(Prop-2-ynyloxy)benzo[d]thiazole-2-carboxamide **7**

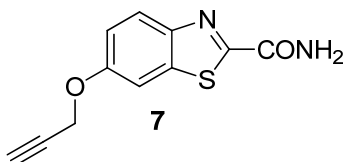

To a solution of ester **6** (2.35 g, 9 mmol) in EtOH 100 mL was added ammonium hydroxide 40 mL. The reaction mixture was heated to 75 °C for 5 h and then cooled to RT. Solvent was removed using a rota-evaporator, and the resulting precipitate was filtered, washed with H<sub>2</sub>O, EtOH and EtOAc to give a white solid (1.54 g, yield 73%). <sup>1</sup>H NMR (CDCl<sub>3</sub>): 8.41 (s, 1H), 8.03 (d, *J* = 9.1 Hz, 1H), 8.01 (s, 1H), 7.82 (d, *J* = 2.3 Hz, 1H), 7.26 (dd, *J* = 2.3, 9.1 Hz, 1H), 4.92 (d, *J* = 2.2 Hz, 2H, ), 3.64 (t, *J* = 2.2 Hz, 1H); <sup>13</sup>C NMR (CDCl<sub>3</sub>): 163.7, 162.4, 157.3, 148.7, 138.9, 125.7, 118.3, 107.3, 79.8, 79.6, 57.1. IR film 3424.7, 3301.3, 1696.0, 1600.8, 1502.0, 1399.5, 1256.1, 1230.5; HRMS (ESI) for  $C_{11}H_9N_2O_2S$   $[M+H]^+$  Calcd 233.0380; found 233.0387.

6-(Prop-2-ynyloxy)benzo[d]thiazole-2-carbonitrile **8**

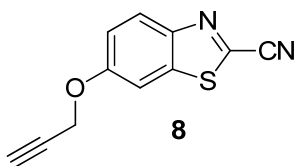

To a suspension of amide **7** (1.1 g, 4.7 mmol) in anhydrous pyridine (25 mL) was added a solution of phosphorous oxychloride (0.85 mL, 9.4 mmol) in CH<sub>2</sub>Cl<sub>2</sub> (5 mL) dropwise at 0 °C. After stirring at 0 °C for 1 h, the reaction was slowly warmed to ambient temperature and the resulting solution was stirred for an additional 12 h. CH<sub>2</sub>Cl<sub>2</sub> (200 mL) was added, and the reaction was quenched by addition of H<sub>2</sub>O 20 mL. The organic phase was separated, washed with H<sub>2</sub>O (20 mL × 2), brine (20 mL), and dried over Na<sub>2</sub>SO<sub>4</sub>. Solvent evaporation followed by flash chromatography (Hex: EtOAc, 6:1) afforded

compound **8** as a light yellow solid (900 mg, yield 82%).  $^1\text{H}$  NMR ( $\text{CDCl}_3$ ): 8.14 (d,  $J = 9.1$  Hz, 2H), 7.51 (d,  $J = 2.5$  Hz, 1H), 7.25 (dd,  $J = 2.5, 9.1$  Hz, 1H), 4.83 (d,  $J = 2.4$  Hz, 2H), 2.61 (t,  $J = 2.4$  Hz, 1H);  $^{13}\text{C}$  NMR ( $\text{CDCl}_3$ ): 158.2, 147.4, 137.2, 134.0, 126.0, 118.8, 113.1, 104.7, 56.5; IR film 3255.3, 2232.2, 2126.5, 1606.5, 1551.5, 1470.1, 1256.8, 1230.3, 1132.0, 1049.9, 127.7. HRMS (ESI) for  $\text{C}_{11}\text{H}_7\text{N}_2\text{OS}$   $[\text{M}+\text{H}]^+$  Calcd. 215.0279, Found 215.0289

### CBT-T **9**

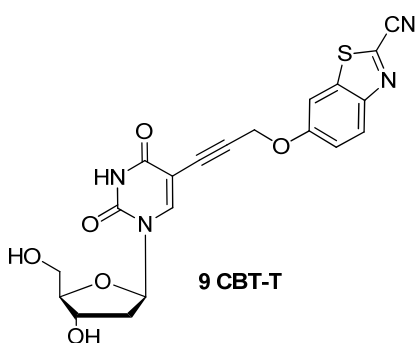

To a mixture of 5-iodo-deoxyuridine (708 mg, 2 mmol),  $\text{Pd}(\text{PPh}_3)_4$  (230 mg, 0.2 mmol), and  $\text{CuI}$  (76 mg, 0.4 mmol) in anhydrous DMF (12 mL) under argon was added DIPEA (0.62 mL, 4 mmol) followed by a solution of compound **8** (700 mg, 3.0 mmol) in DMF (4 mL). After stirring at RT overnight, DMF was evaporated, and the remaining dark gum was purified by flash chromatography (DCM: MeOH, 20 : 1) to afford compound **9** as a pale yellow solid (630 mg, yield 72%).  $^1\text{H}$  NMR ( $\text{CD}_3\text{OD}$ ): 8.39 (s, 1H), 8.08 (d,  $J = 9.2$  Hz, 2H), 7.81 (d,  $J = 2.0$  Hz, 1H), 7.34 (dd,  $J = 2.0, 9.2$  Hz, 1H), 6.22 (t,  $J = 6.4$  Hz), 5.07 (s, 2H), 4.39 (m, 1H), 3.94 (d,  $J = 3.2$  Hz), 3.83 (m, 1H), 3.23 (s, 1H), 2.30 (m, 1H), 2.20 (m, 1H);  $^{13}\text{C}$  NMR ( $\text{CD}_3\text{OD}$ ): 164.3, 159.9, 151.1, 148.4, 146.4, 138.8, 135.6, 126.5, 120.3, 114.2, 106.4, 99.2, 89.2, 88.4, 87.2, 80.6, 71.8, 62.5, 58.1, 55.8, 41.8; IR film 3413.7, 2229.5, 1725.8, 1667.6, 1616.6, 1600.8, 1475.2, 1372.7, 1278.4, 1229.3, 1129.9, 1091.8, 1001.6; HRMS (ESI) for  $\text{C}_{20}\text{H}_{16}\text{N}_4\text{O}_6\text{SNa}$   $[\text{M}+\text{Na}]^+$  Calcd 463.0683; Found 463.0674.

### CBT-TTP **10**

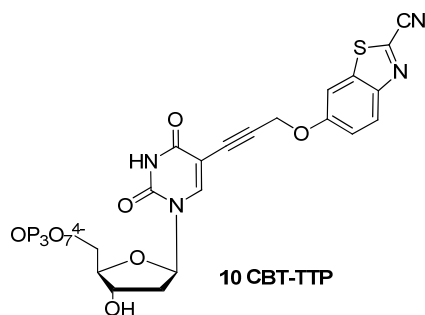

To a solution of CBT-T **9** (70 mg, 0.16 mmol) and proton sponge (42 mg, 0.19 mmol, pre-dried in vacuum over  $P_2O_5$  overnight) in anhydrous trimethylphosphate (0.6 mL) was added freshly distilled  $POCl_3$  (18  $\mu$ L, 0.19 mmol) dissolved in anhydrous trimethylphosphate (0.2 mL) dropwise via a syringe with stirring under argon at 0 °C. The reaction mixture was further stirred in an ice-bath for 2 h and then a solution of tributylammonium pyrophosphate (226 mg, 0.48 mmol) and tri-*n*-butylamine (0.4 mL,) in 1.0 mL of anhydrous DMF was added in one portion. The mixture was stirred at RT for 10 min and then triethylammonium bicarbonate solution (0.1 M, pH 8, 11 mL) was added. After stirring at RT for an additional hour, the resulting reaction mixture was transferred to a 50-mL centrifuge tube. Then EtOH (33 mL) was added followed by 3 M NaCl solution (1.0 mL). After vortexing for 10 sec, the centrifuge tube was placed at – 80 °C for 1 h, and then centrifuged at 5000 rpm for 20 min. After removing the supernatant, the resulting pellet was purified by HPLC and lyophilized to give a pale yellow powder (9 mg, 10%).  $^1H$  NMR ( $D_2O$ ): 8.57 (s, 1H), 8.05 (d,  $J$  = 6.8 Hz, 2H), 7.65 (s, 1H), 7.27 (d,  $J$  = 9.2 Hz, 1H), 6.11 (t,  $J$  = 6.4 Hz), 5.00 (s, 2H), 4.11-4.13(m, 3H), 2.27-2.31 (m, 2H);  $^{13}C$  NMR ( $D_2O$ ): 158.5, 151.5, 147.1, 146.0, 138.1, 135.7, 125.7, 119.9, 113.9, 106.2, 99.2, 88.9, 86.5, 86.4, 86.3, 79.5, 70.8, 65.8, 58.1, 58.0, 39.3, 17.5;  $^{31}P$  NMR ( $D_2O$ ) -10.9, -11.5, -23.4. HRMS (ESI) for  $C_{20}H_{18}N_4O_{15}P_3S$  [M-H] $^-$  Calcd. 678.9702; Found 678.9683.

### 3. Experimental Procedure for the Synthesis of Cys-BA

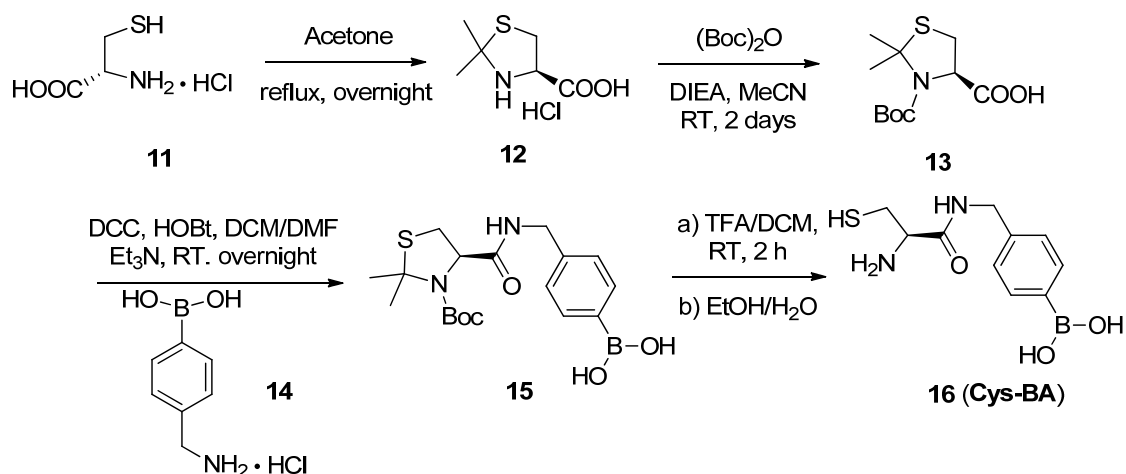

Scheme S1. Synthesis of Compound **16 (Cys-BA)**

L-(-)-(tert-Butoxycarbonyl)-2,2-dimethylthiazolidine-4-carboxylic acid **13**

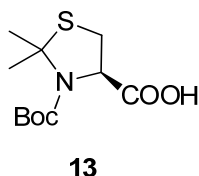

Compound **13** was prepared starting from L-cysteine hydrochloride (**11**) in two steps following literature procedures.<sup>[1]</sup>

Cys-BA (**16**)

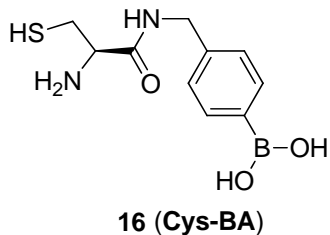

To a mixture of compound **13** (836 mg, 3.2 mmol), **14** (500 mg, 2.7 mmol), and HOBT (397 mg, 2.9 mmol) in anhydrous DCM (20 mL) and DMF (20 mL) under ice-bath, was added Et<sub>3</sub>N (0.7 mL, 5.3 mmol) followed DCC (607 mg, 2.9 mmol) in one portion. The mixture was stirred at RT overnight and the resulting solid was filtered off. The filtrate was concentrated under vacuum and the residue was purified by flash chromatography (DCM: MeOH, 30:1) to afford intermediate **15**. <sup>1</sup>H NMR (CDCl<sub>3</sub>): 7.83 (d, *J* = 6.8 Hz,

2H), 7.25 (d,  $J = 6.8$  Hz, 2H), 4.82 (brs, 1H), 4.48 (s, 2H), 3.25 (m, 2H), 1.82 (s, 3H), 1.77 (s, 3H), 1.50 (s, 6H).

Compound **15** was stirred in DCM/TFA (20 mL/20 mL) at RT for another 2 h. Solvent was evaporated under vacuum and the residue was treated with diethyl ether (100 mL). The resulting precipitate was collected through filtration. After washing three times with diethyl ether, the collected precipitate was dissolved in EtOH/H<sub>2</sub>O (300 mL/300 mL) with stirring for 30 mins. Evaporation of the solvent yielded compound **16** as a white solid (497 mg, 73% in two steps). <sup>1</sup>H NMR (CD<sub>3</sub>OD): 7.67 (d,  $J = 4.0$  Hz, 2H), 7.25 (d,  $J = 4.0$  Hz, 2H), 4.39 (m, 1H), 4.08 (m, 1H), 3.00 (m, 2H); <sup>13</sup>C NMR (CD<sub>3</sub>OD): 168.2, 140.7, 134.9, 127.7, 55.8, 44.2, 26.1; HRMS (ESI) for C<sub>10</sub>H<sub>15</sub>BN<sub>2</sub>O<sub>3</sub>S [M+H]<sup>+</sup> Calcd 255.0969; Found 255.0965.

#### 4. Kinetic studies of the reaction between CBT-T and 1, 2-aminothiols (L-cysteine)

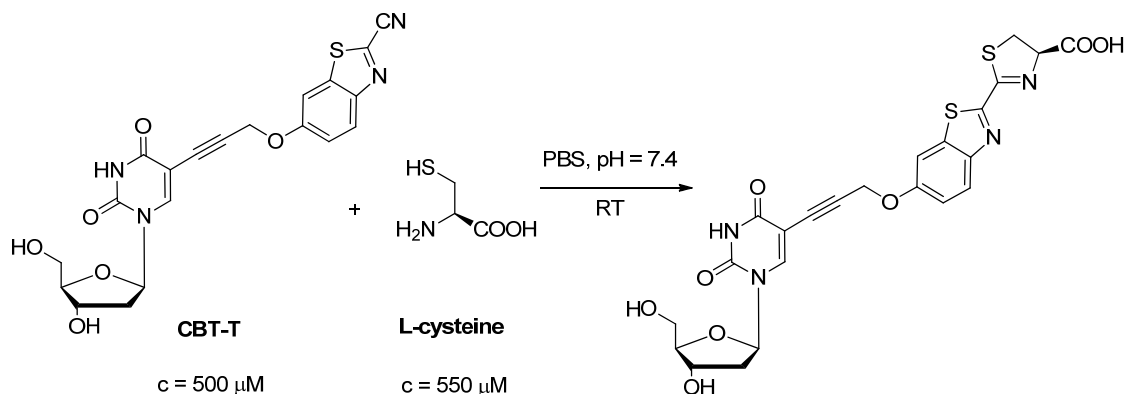

Scheme S2. Reaction scheme of CBT-T with L-cysteine

To a solution of CBT-T **9** in acetonitrile was added a solution of L-cysteine in PBS buffer (pH = 7.4) to afford the final concentration of CBT-T (500  $\mu$ M), L-cysteine (550  $\mu$ M) in a mixture of acetonitrile/PBS buffer (v/v: 1/4). The resulting mixture was stirred at room temperature and monitored by HPLC at different time points in a similar way as literature reported.<sup>[2]</sup> Applying similar kinetic analysis reported in the references,  $1/[\text{CBT-T}]$  vs reaction time was plotted and the linear regression analysis of  $1/[\text{CBT-T}]$  vs. time gave the second-order rate constant as 22 M<sup>-1</sup> s<sup>-1</sup>.



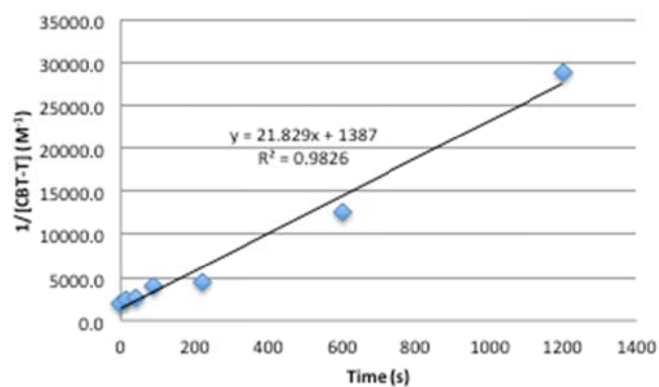

Figure S1. Linear regression analysis of  $1/[CBT-T]$  vs. time of the CBT-T condensation reaction

## 5. MALDI-TOF spectra of DNA products

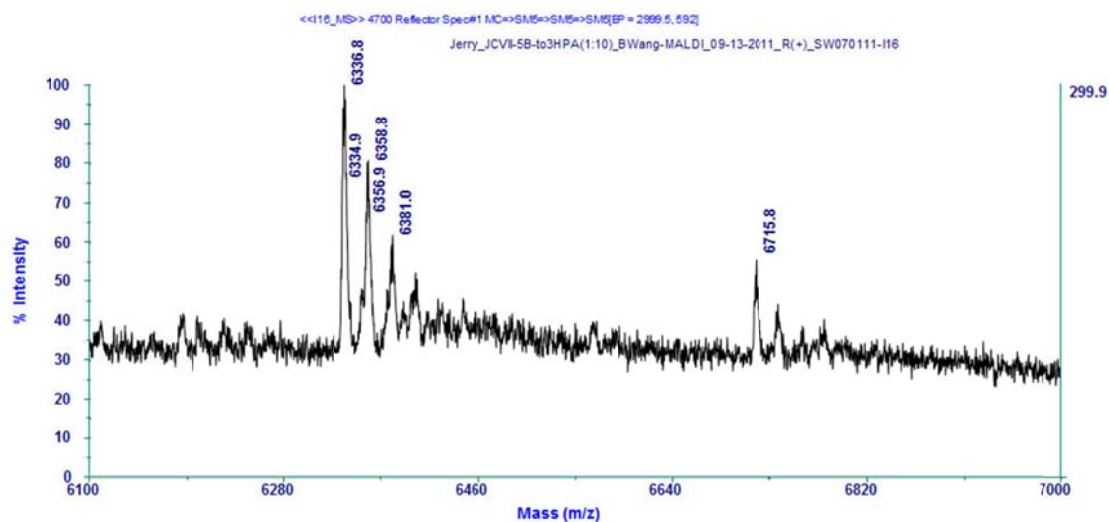

Figure S2. MALDI-TOF spectra of CBT-DNA<sub>21</sub> (Template-1)

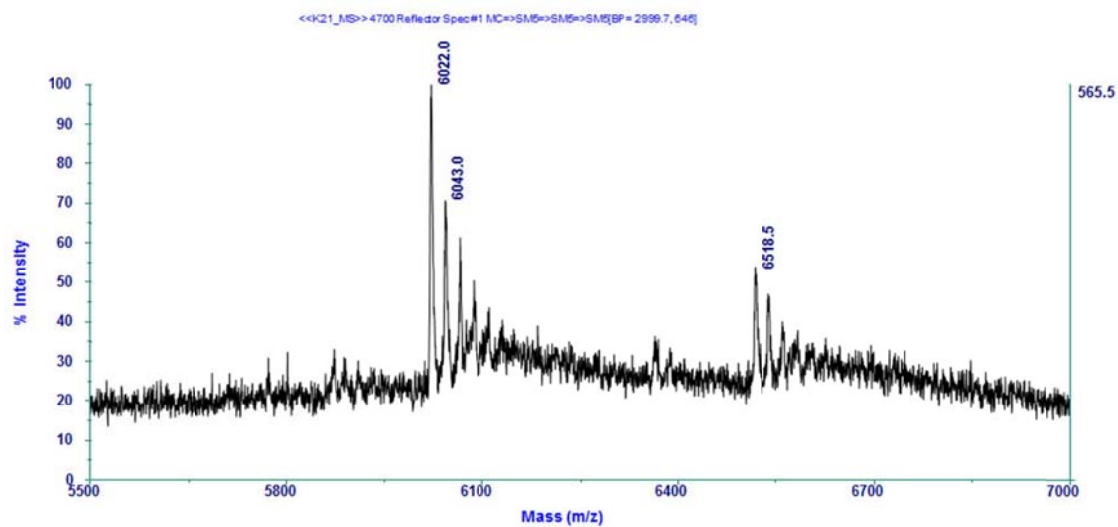

Figure S3. MALDI-TOF spectra of dNTP-DNA<sub>21</sub> (Template-1)

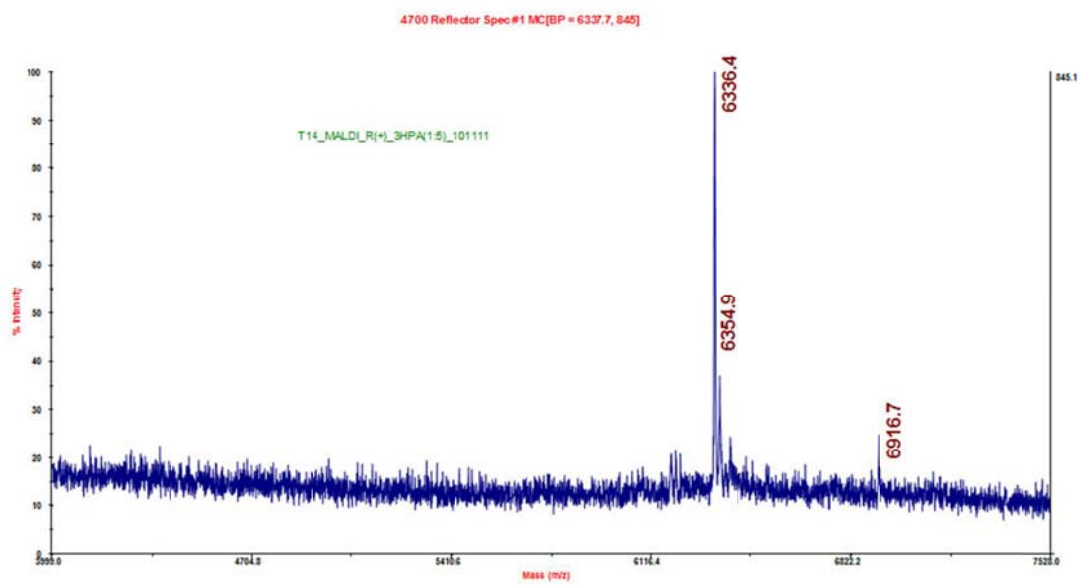

Figure S4. MALDI-TOF spectra of click product of CBT-DNA<sub>21</sub> and Cys-BA (Template-1)

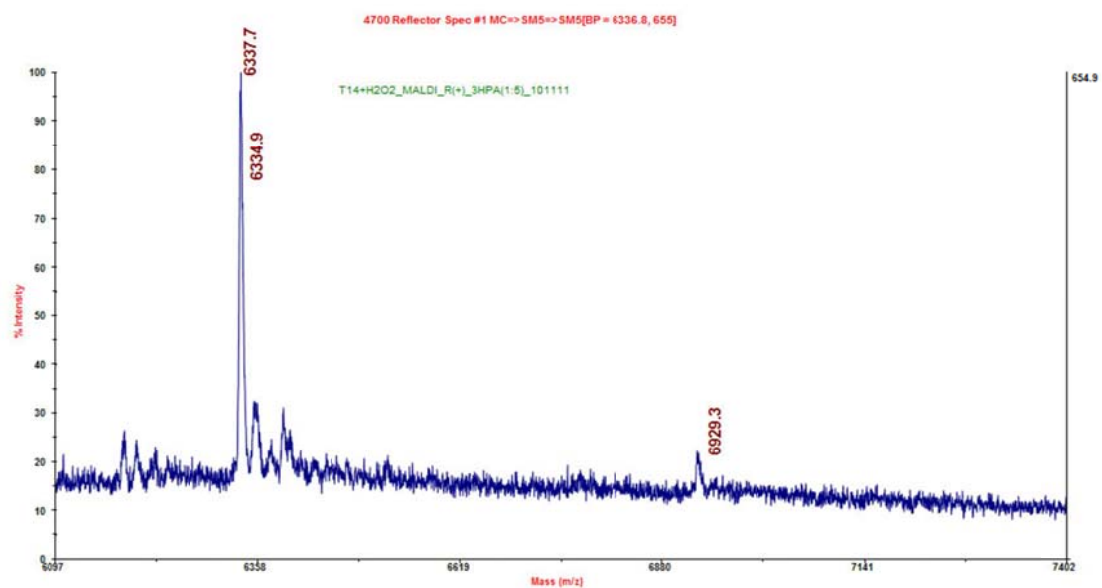

Figure S5. MALDI-TOF spectra of H<sub>2</sub>O<sub>2</sub> treated click product of CBT-DNA<sub>21</sub> (Template-1)

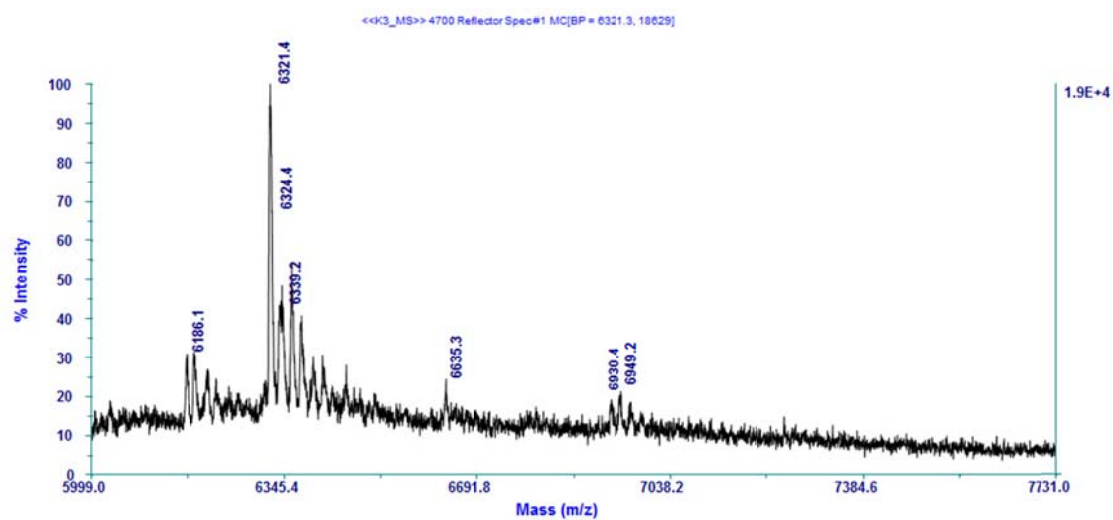

Figure S6. MALDI-TOF spectra of CBT-DNA<sub>21</sub> (Template-2)

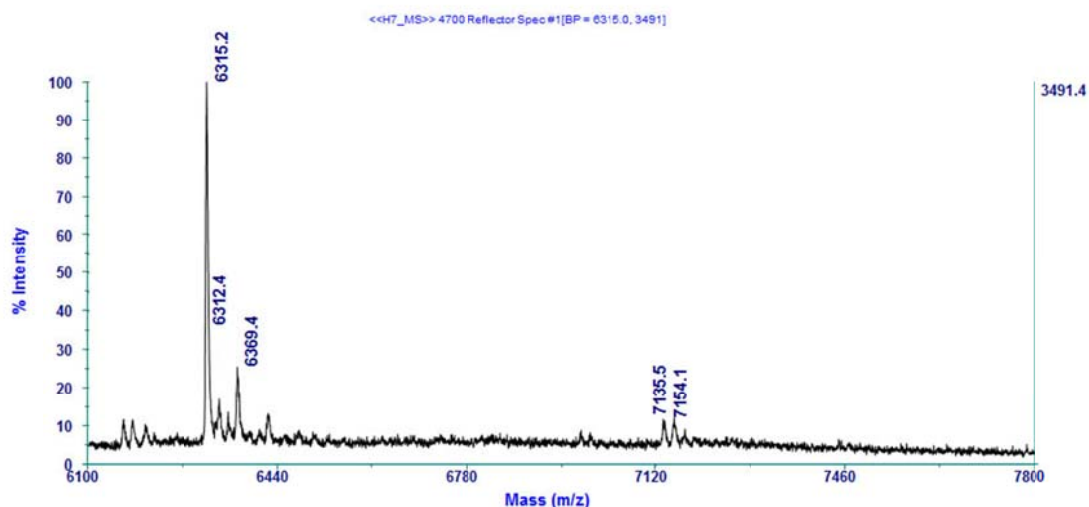

Figure S7. MALDI-TOF spectra of CBT-DNA<sub>21</sub> (Template-3)

## 6. Thermodenaturation of duplex DNAs

The UV-melting temperature studies were carried out by Cary 300 UV-Vis Spectrophotometer and a temperature control module. Duplex DNA samples were prepared through Klenow fragment primer extension reactions with dTTP or CBT-TTP. Post-synthetic sample was prepared by click reaction of CBT-DNA<sub>21</sub> with Cys-BA. All samples were cleaned using Millipore Amicon 10 kDa spin column. The samples (1  $\mu$ M DNA duplexes) were dissolved in PBS buffer (pH 7.4). The samples were heated to 80 °C and cooled to 6 °C at a rate of 0.5 °C per min. 4 Rounds of melting were performed for each sample. The melting temperature data and curves are presented in Table S1 and Figure S7.

Table S1. Melting temperatures ( $T_m$ ) of DNA dueplexes

| DNA/Rounds                     | 1     | 2     | 3     | 4     | Average          |
|--------------------------------|-------|-------|-------|-------|------------------|
| dNTPs-DNA <sub>21</sub>        | 72.97 | 73.02 | 73.02 | 72.97 | 73.00 $\pm$ 0.03 |
| CBT-DNA <sub>21</sub>          | 70.94 | 70.97 | 70.97 | 70.97 | 70.96 $\pm$ 0.02 |
| CBT-DNA <sub>21</sub> + Cys-BA | 69.87 | 70.92 | 69.92 | 70.92 | 70.24 $\pm$ 0.59 |

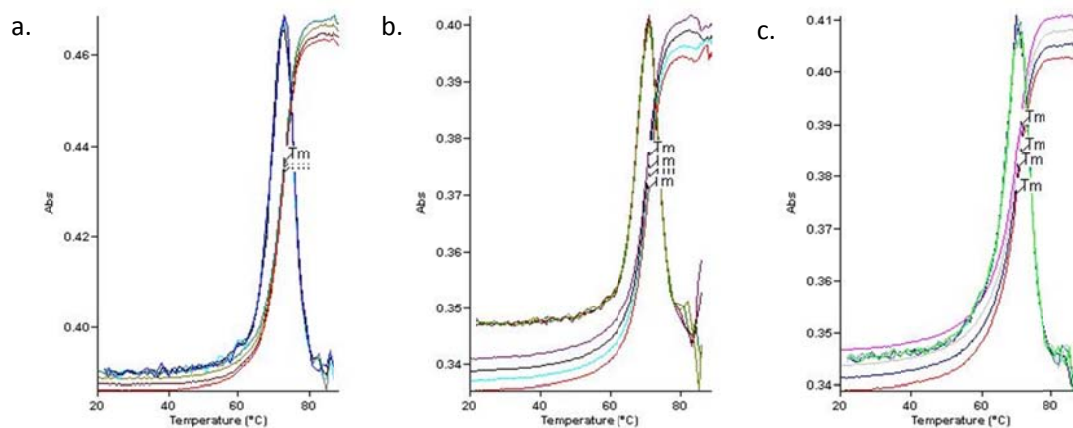

Figure S8. UV-melting curves of DNA duplexes, a. dNTPs-DNA<sub>21</sub>, b. CBT-DNA<sub>21</sub>, c. dNTPs-DNA<sub>21</sub> + Cys-BA.

#### References:

- [1] D. S. Kemp and R. I. Carey, *J. Org. Chem* **1989**, *54*, 3640-3646.  
 [2] a) G. L. Liang, H. J. Ren and J. H. Rao, *Nat. Chem.* **2010**, *2*, 54-60; b) J. M. Baskin, J. A. Prescher, S. T. Laughlin, N. J. Agard, P. V. Chang, I. A. Miller, A. Lo, J. A. Codelli and C. R. Bertozzi, *P. Natl. Acad. Sci. USA.* **2007**, *104*, 16793-16797.

#### 7. NMR spectrum of synthesized compounds (Please see next page)

PHJ-8-125  
CDC13  
04-17-2011

8.153  
8.131  
7.490  
7.484  
7.269  
7.254  
7.247  
7.231  
7.225

4.804  
4.798  
4.570  
4.552  
4.534  
4.516

2.590  
2.584  
2.578  
1.619  
1.502  
1.484  
1.466

— -0.000

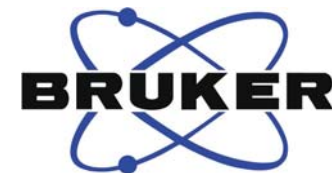

Current Data Parameters  
NAME PHJ-8-125  
EXPNO 1  
PROCNO 1

F2 - Acquisition Parameters  
Date\_ 20110417  
Time 15.49  
INSTRUM spect  
PROBHD 5 mm PABBO BB-  
PULPROG zg30  
TD 65536  
SOLVENT CDC13  
NS 16  
DS 2  
SWH 8223.685 Hz  
FIDRES 0.125483 Hz  
AQ 3.9846387 sec  
RG 161  
DW 60.800 usec  
DE 6.50 usec  
TE 296.6 K  
D1 1.00000000 sec

==== CHANNEL f1 =====  
NUC1 1H  
P1 13.50 usec  
PLW1 16.00000000 W  
SFO1 400.1424008 MHz

F2 - Processing parameters  
SI 65536  
SF 400.1400059 MHz  
WDW EM  
SSB 0  
LB 0.30 Hz  
GB 0  
PC 1.00

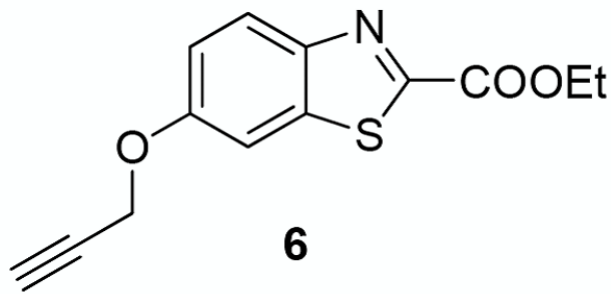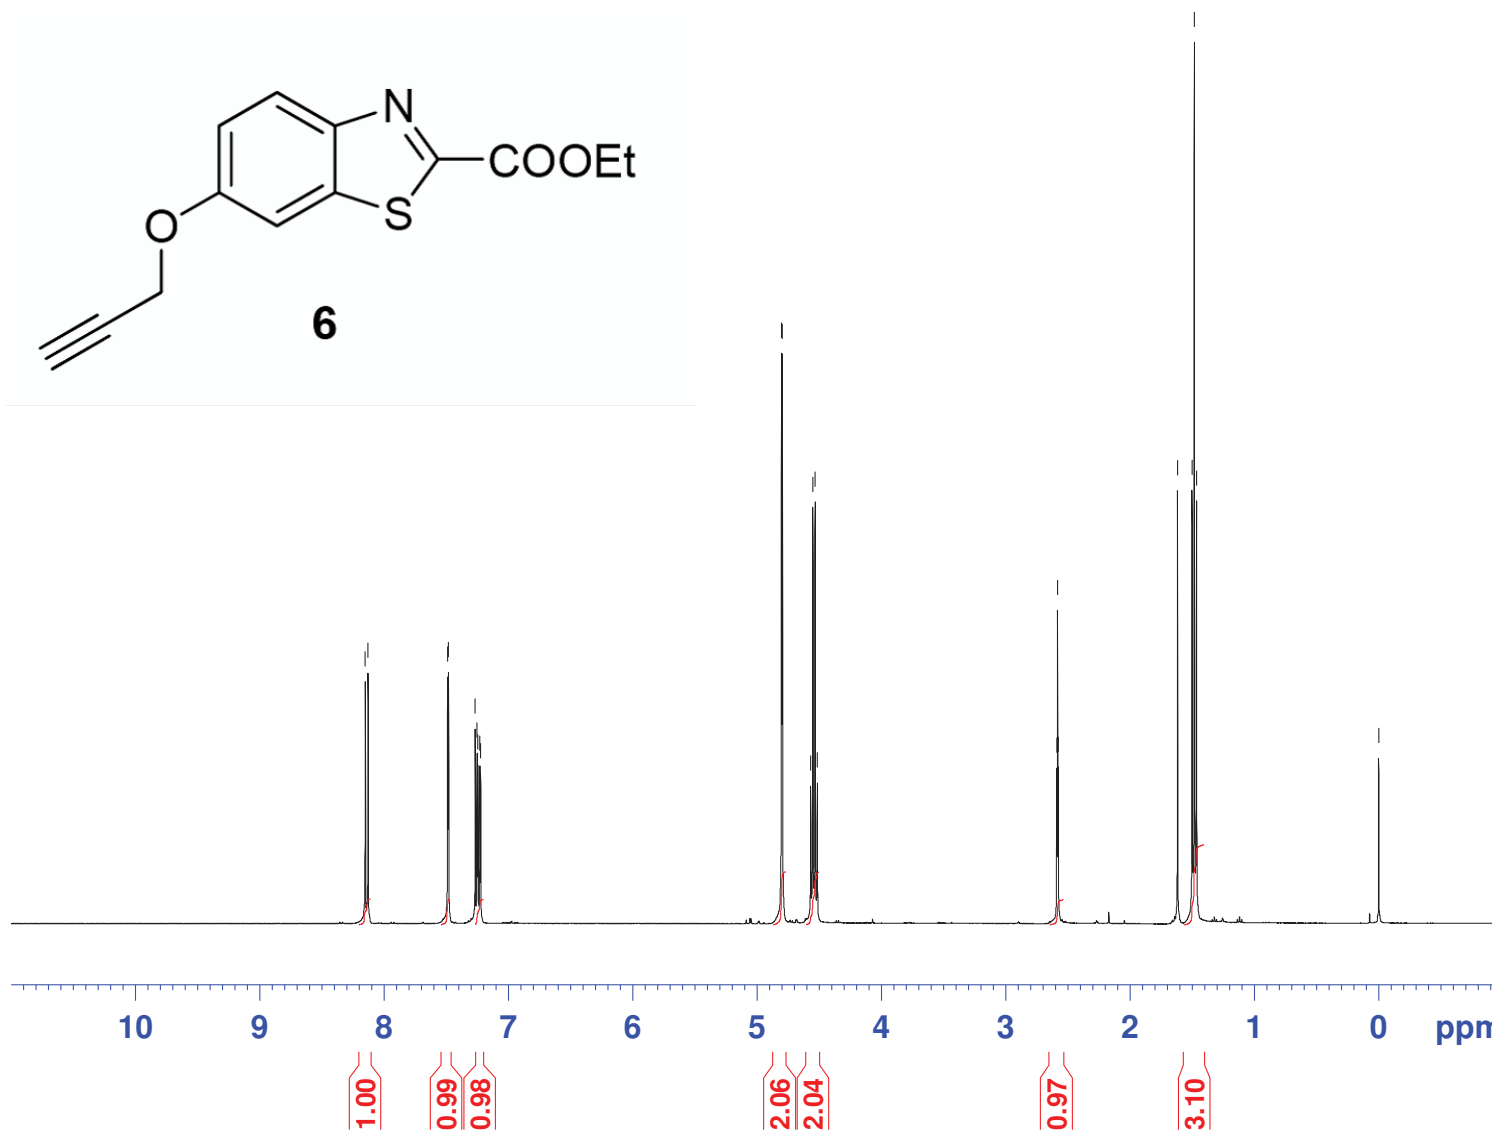

DCF-IV-14-C13



Current Data Parameters  
NAME DCF-IV-14  
EXPNO 2  
PROCNO 1

F2 - Acquisition Parameters  
Date\_ 20110206  
Time 14.54  
INSTRUM spect  
PROBHD 5 mm PABBO BB-  
PULPROG zgpg30  
TD 65536  
SOLVENT CDCl3  
NS 648  
DS 4  
SWH 24038.461 Hz  
FIDRES 0.366798 Hz  
AQ 1.3631988 sec  
RG 203  
DW 20.800 usec  
DE 6.50 usec  
TE 295.4 K  
D1 2.00000000 sec  
D11 0.03000000 sec

==== CHANNEL f1 =====  
NUC1 13C  
P1 9.00 usec  
PLW1 53.48799896 W  
SFO1 100.6253441 MHz

==== CHANNEL f2 =====  
CPDPRG2 waltz16  
NUC2 1H  
PCPD2 90.00 usec  
PLW2 12.22599983 W  
PLW12 0.28864691 W  
PLW13 0.14466980 W  
SFO2 400.1416006 MHz

F2 - Processing parameters  
SI 32768  
SF 100.6152830 MHz  
WDW EM  
SSB 0  
LB 1.00 Hz  
GB 0  
PC 1.40

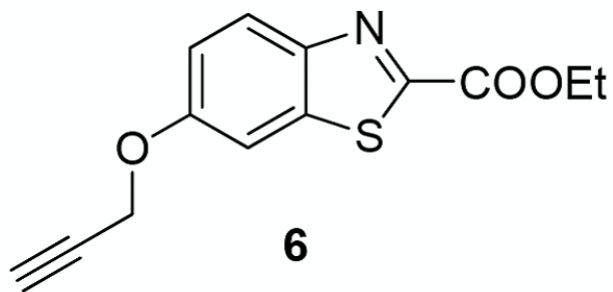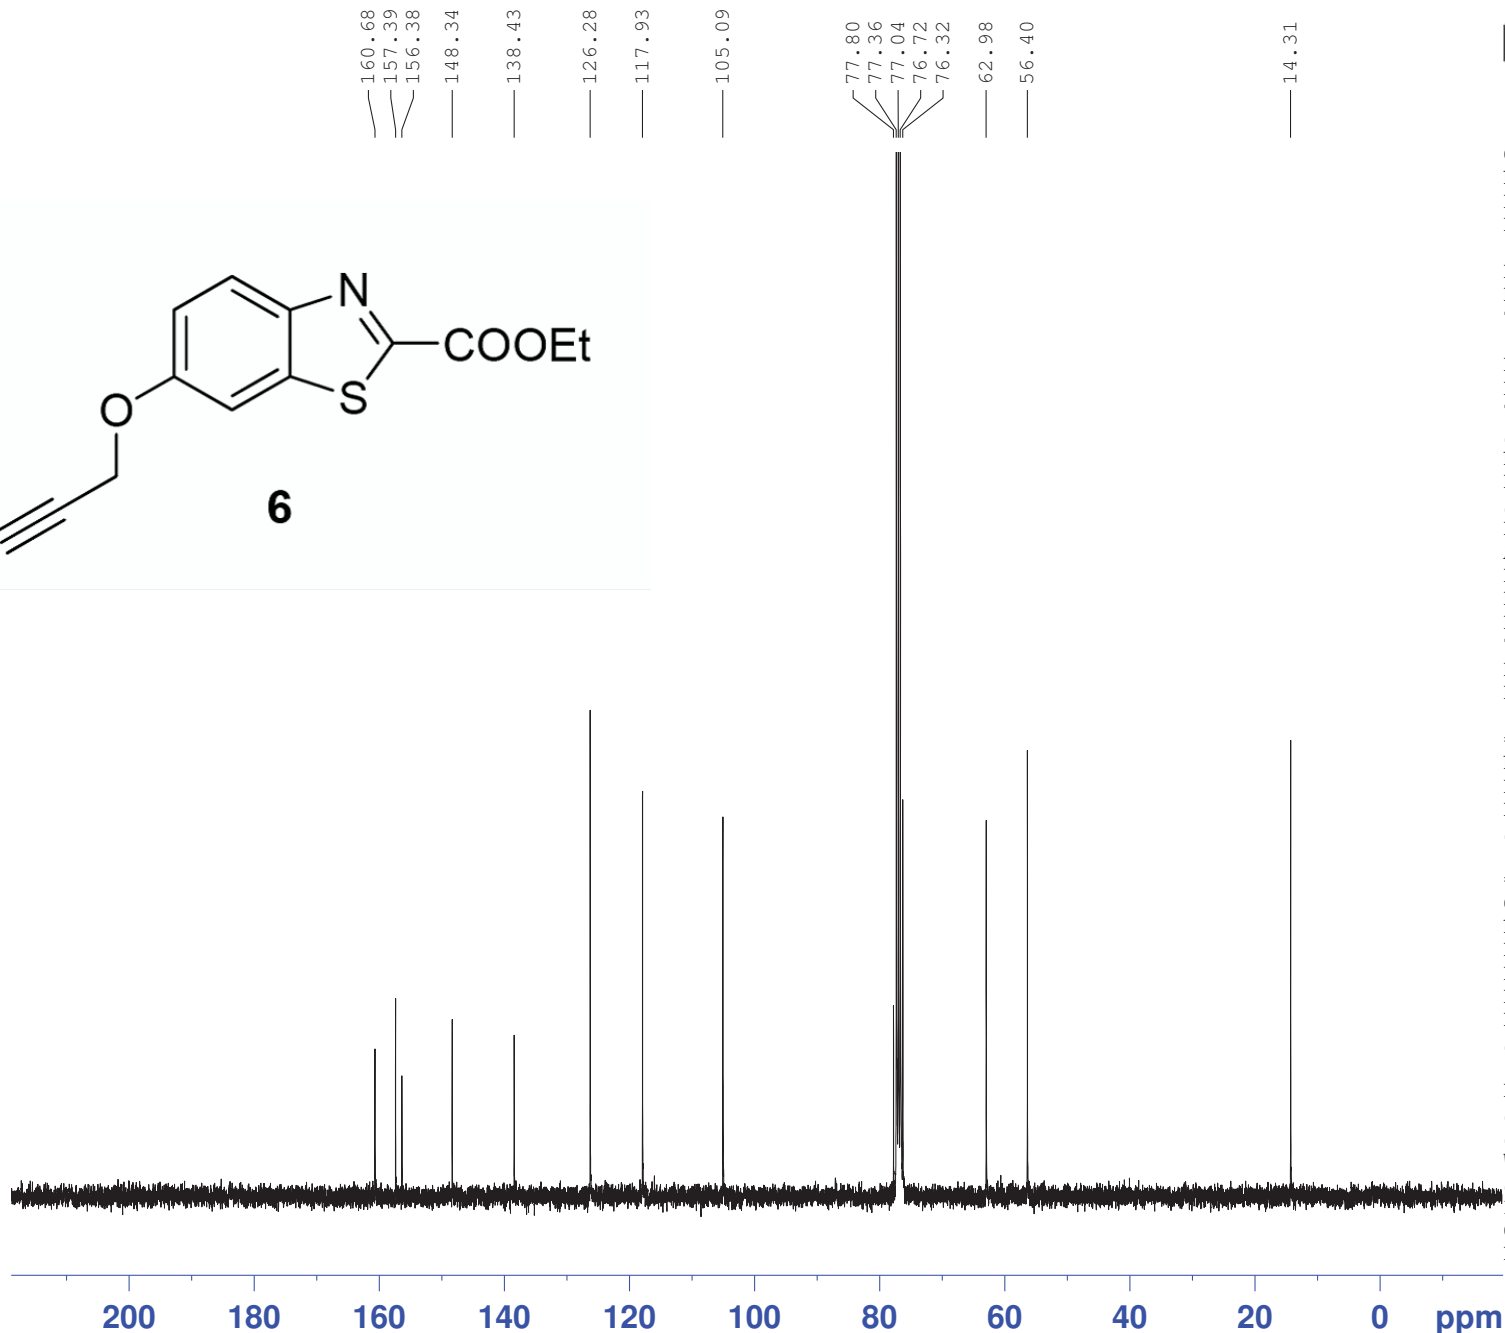

DCF-IV-15-3

8.413  
8.042  
8.019  
8.009  
7.821  
7.815  
7.277  
7.271  
7.255  
7.248

4.929  
4.923

3.647  
3.641  
3.636  
3.344  
3.342  
2.510  
2.506  
2.501

— -0.004

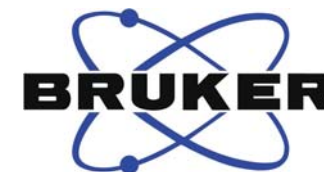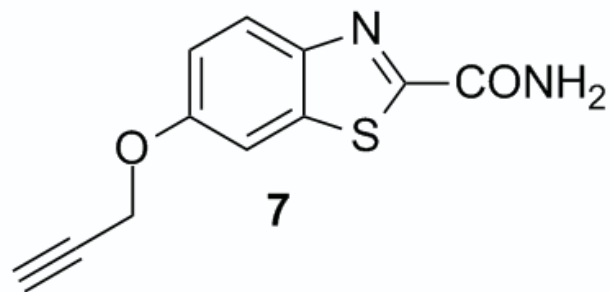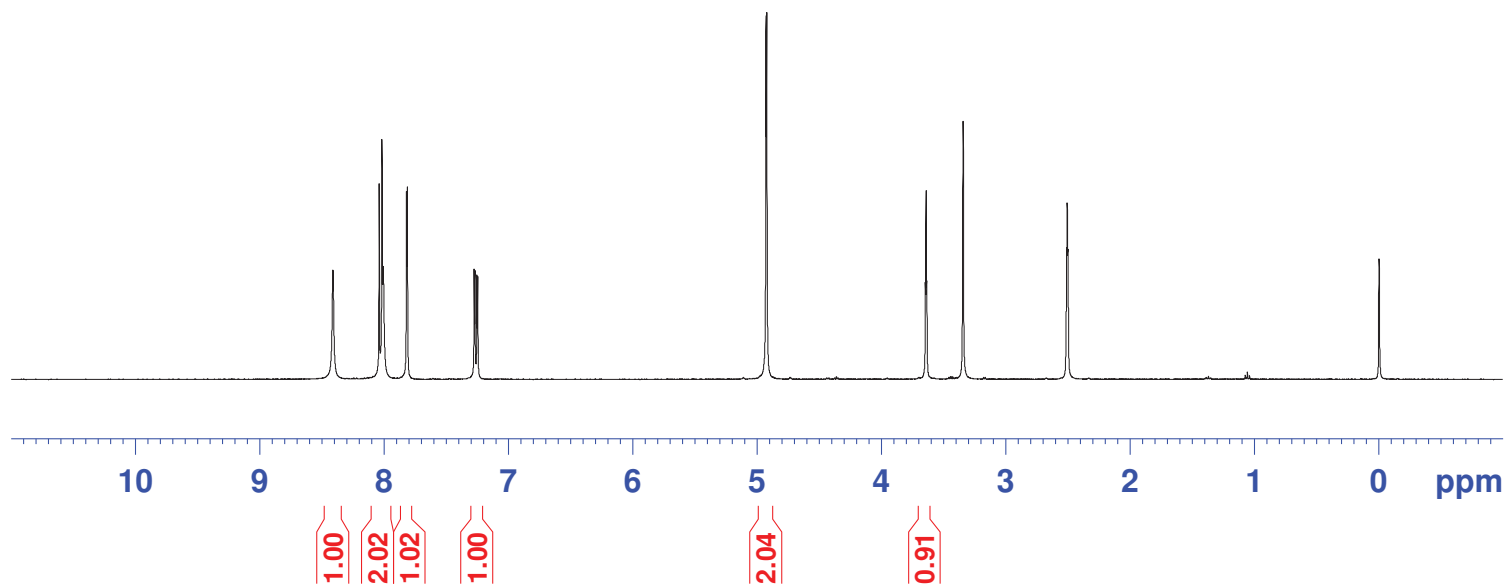

Current Data Parameters  
NAME DCF-IV-15  
EXPNO 3  
PROCNO 1

F2 - Acquisition Parameters  
Date\_ 20110208  
Time 18.40  
INSTRUM spect  
PROBHD 5 mm PABBO BB-  
PULPROG zg30  
TD 65536  
SOLVENT DMSO  
NS 16  
DS 2  
SWH 8223.685 Hz  
FIDRES 0.125483 Hz  
AQ 3.9846387 sec  
RG 203  
DW 60.800 usec  
DE 6.50 usec  
TE 295.1 K  
D1 1.00000000 sec

==== CHANNEL f1 =====  
NUC1 1H  
P1 14.00 usec  
PLW1 12.22599983 W  
SFO1 400.1424710 MHz

F2 - Processing parameters  
SI 65536  
SF 400.1403249 MHz  
WDW EM  
SSB 0  
LB 0.30 Hz  
GB 0  
PC 1.00



DCF-IV-15-C13

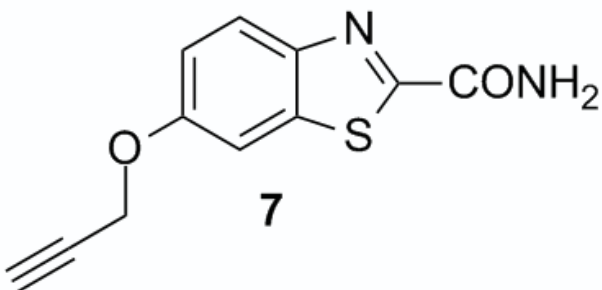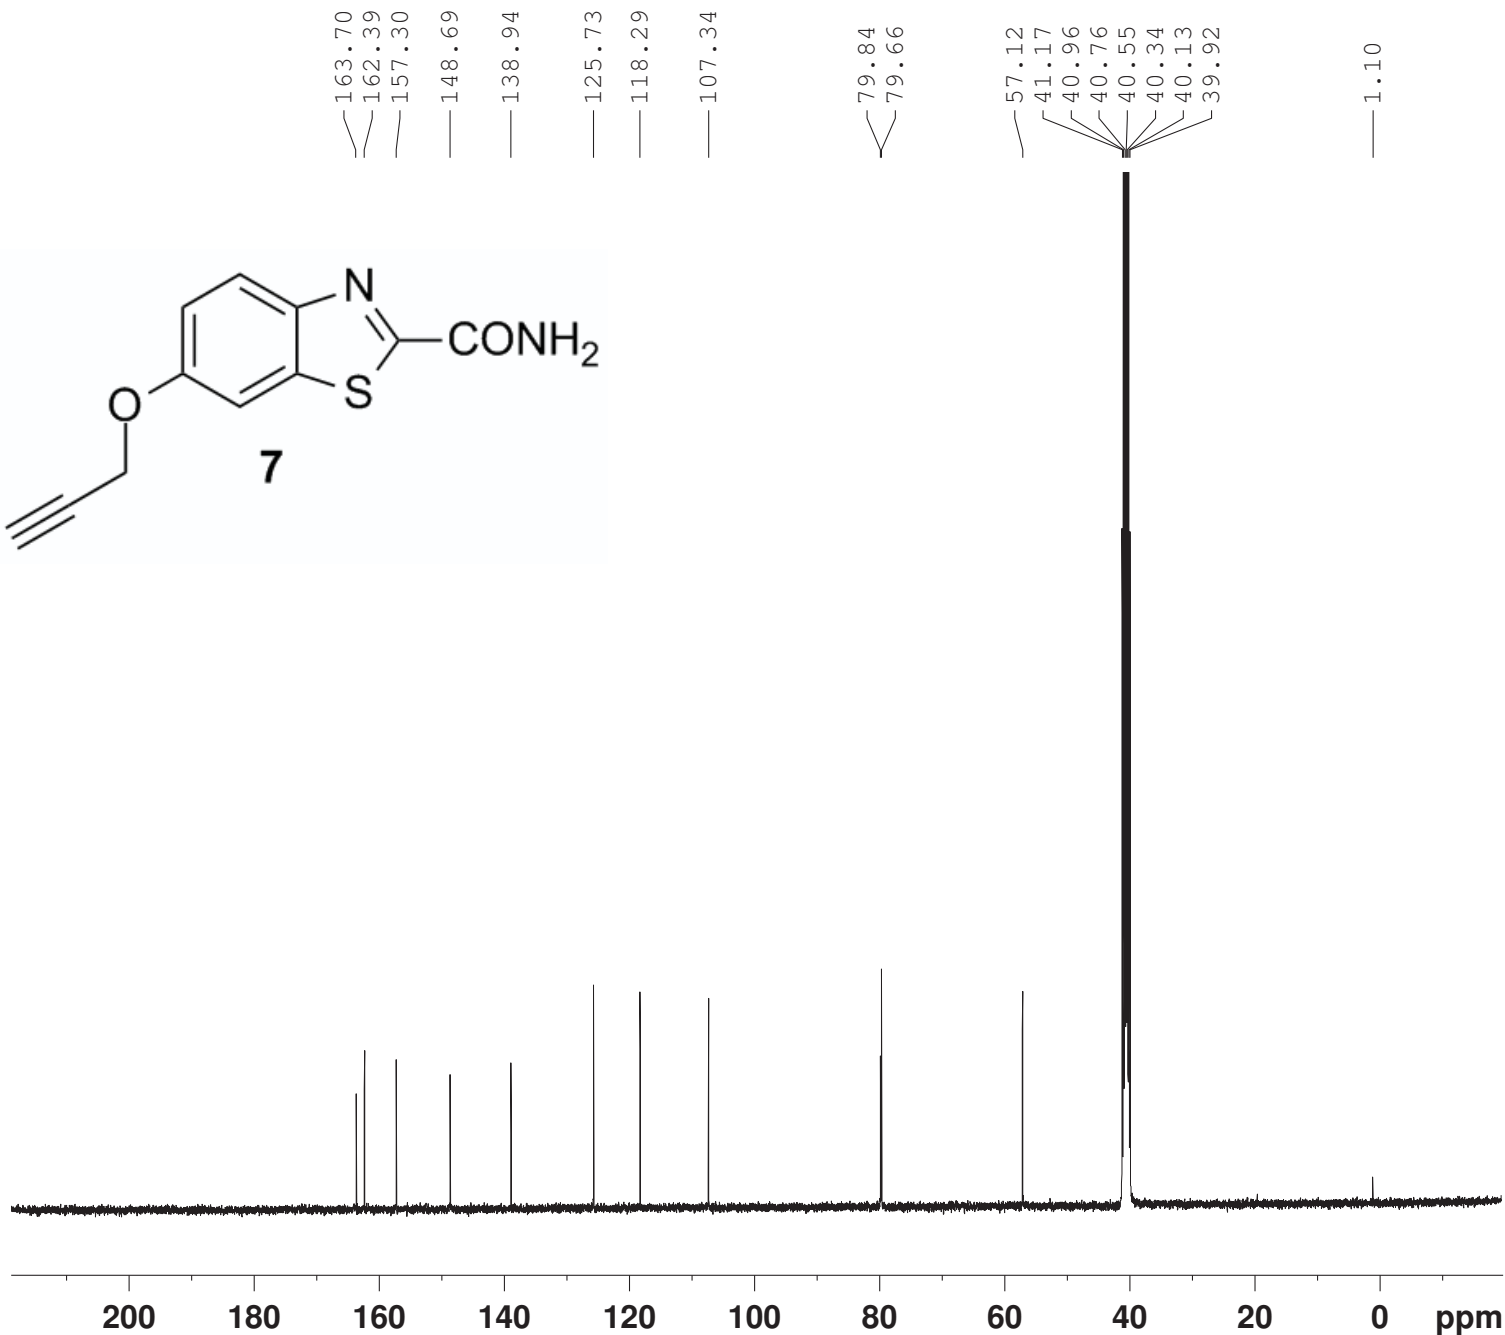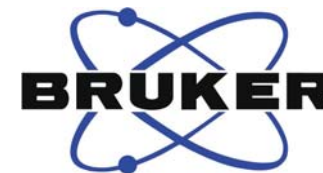

Current Data Parameters  
NAME DCF-IV-15  
EXPNO 4  
PROCNO 1

F2 - Acquisition Parameters  
Date\_ 20110214  
Time 2.02  
INSTRUM spect  
PROBHD 5 mm PABBO BB-  
PULPROG zgpg30  
TD 65536  
SOLVENT DMSO  
NS 10000  
DS 4  
SWH 24038.461 Hz  
FIDRES 0.366798 Hz  
AQ 1.3631988 sec  
RG 203  
DW 20.800 usec  
DE 6.50 usec  
TE 297.3 K  
D1 2.00000000 sec  
D11 0.03000000 sec

==== CHANNEL f1 =====  
NUC1 13C  
P1 9.00 usec  
PLW1 53.48799896 W  
SFO1 100.6253441 MHz

==== CHANNEL f2 =====  
CPDPRG2 waltz16  
NUC2 1H  
PCPD2 90.00 usec  
PLW2 12.22599983 W  
PLW12 0.28864691 W  
PLW13 0.14466980 W  
SFO2 400.1416006 MHz

F2 - Processing parameters  
SI 32768  
SF 100.6152848 MHz  
WDW EM  
SSB 0  
LB 1.00 Hz  
GB 0  
PC 1.40

DCF-IV-17-H1

8.146  
8.123  
7.513  
7.507  
7.339  
7.333  
7.316  
7.310  
7.285

4.842  
4.836

2.621  
2.615  
2.609

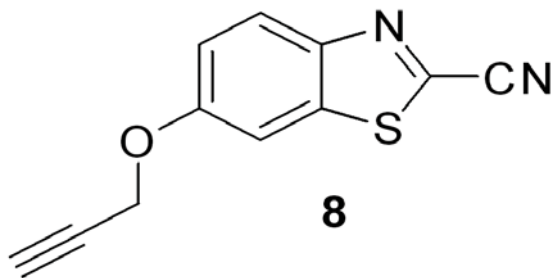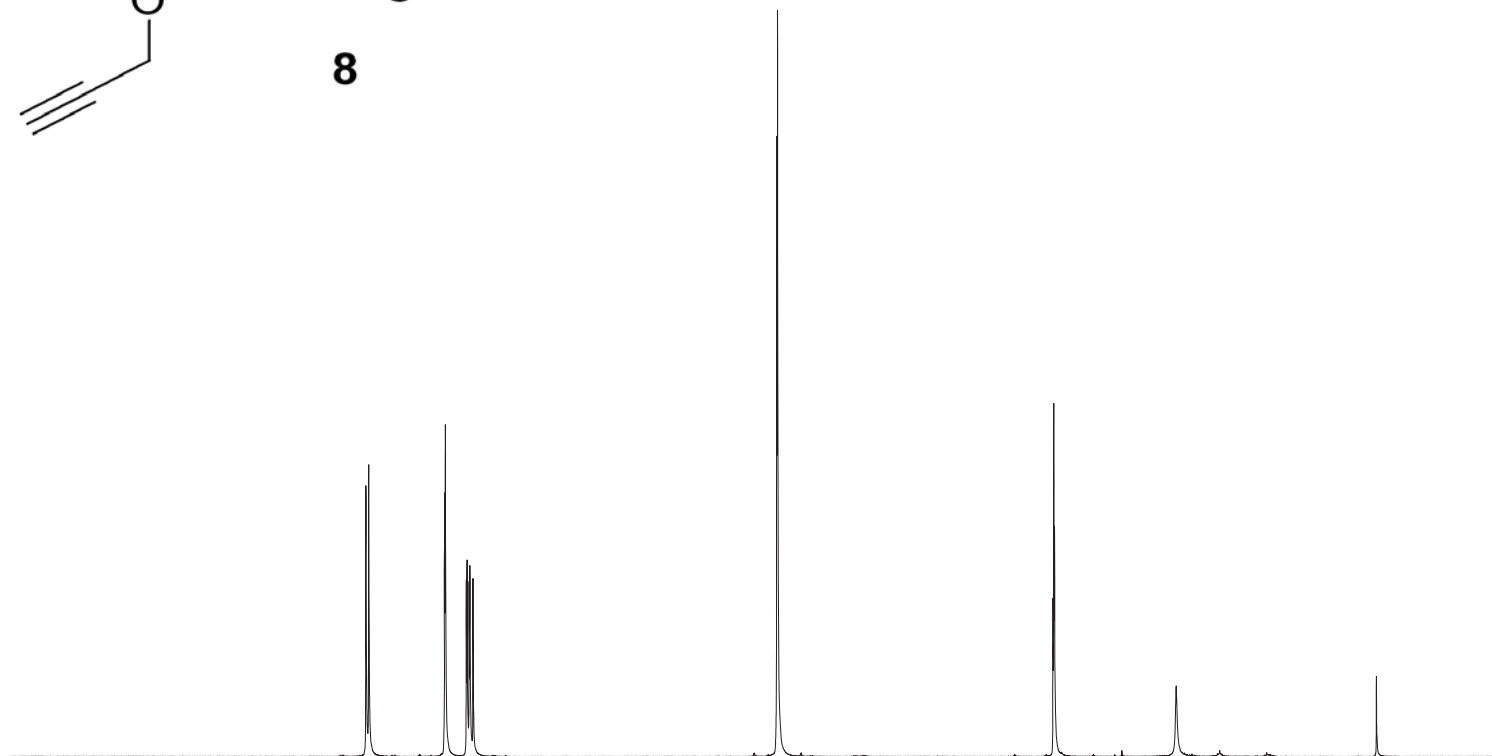

10 9 8 7 6 5 4 3 2 1 0 ppm

1.00  
0.99  
0.93  
0.34

2.00

0.92

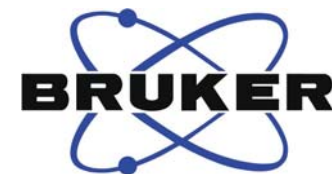

Current Data Parameters  
NAME DCF-IV-17  
EXPNO 2  
PROCNO 1

F2 - Acquisition Parameters  
Date\_ 20110210  
Time 18.41  
INSTRUM spect  
PROBHD 5 mm PABBO BB-  
PULPROG zg30  
TD 65536  
SOLVENT CDCl3  
NS 16  
DS 2  
SWH 8223.685 Hz  
FIDRES 0.125483 Hz  
AQ 3.9846387 sec  
RG 181  
DW 60.800 usec  
DE 6.50 usec  
TE 295.3 K  
D1 1.00000000 sec

==== CHANNEL f1 =====  
NUC1 1H  
P1 14.00 usec  
PLW1 12.22599983 W  
SFO1 400.1424710 MHz

F2 - Processing parameters  
SI 65536  
SF 400.1400000 MHz  
WDW EM  
SSB 0  
LB 0.30 Hz  
GB 0  
PC 1.00

DCF-IV-17b-C13

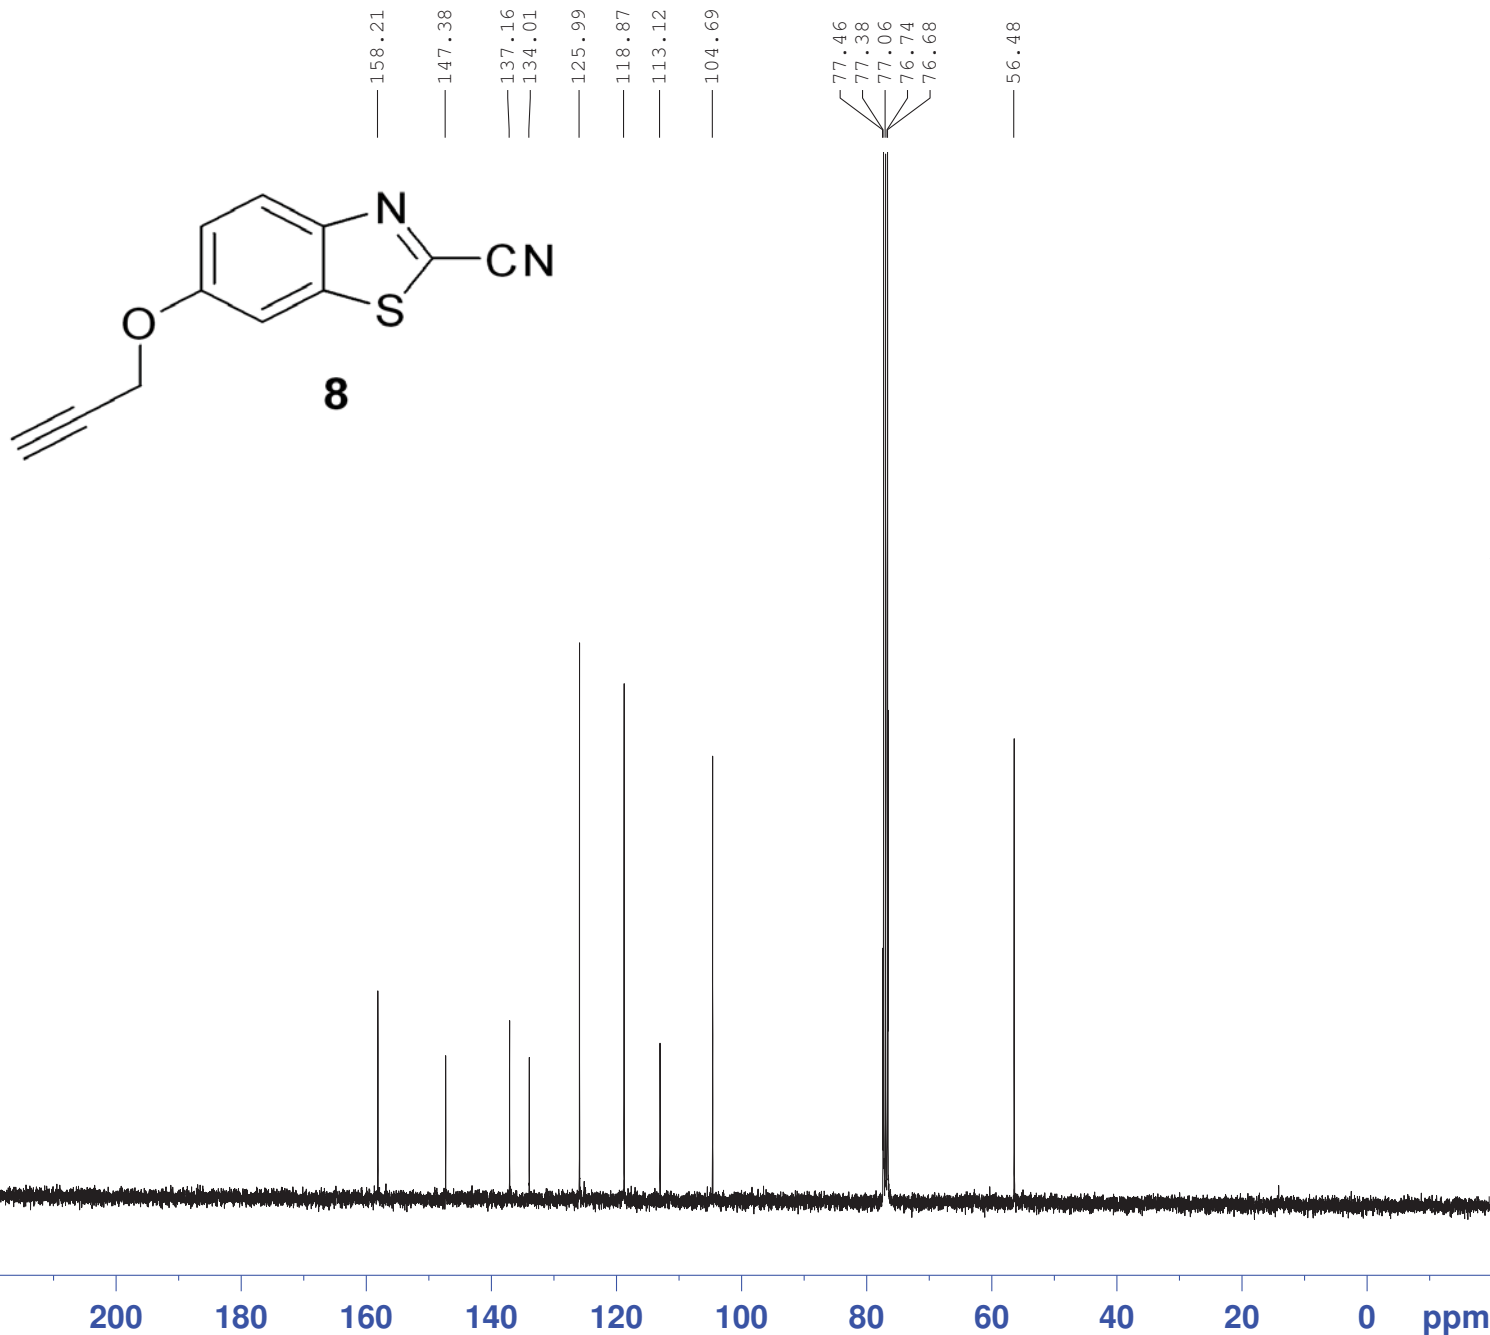

Current Data Parameters  
NAME DCF-IV-17b  
EXPNO 2  
PROCNO 1

F2 - Acquisition Parameters  
Date\_ 20110213  
Time 15.36  
INSTRUM spect  
PROBHD 5 mm PABBO BB-  
PULPROG zgpg30  
TD 65536  
SOLVENT CDCl3  
NS 388  
DS 4  
SWH 24038.461 Hz  
FIDRES 0.366798 Hz  
AQ 1.3631988 sec  
RG 203  
DW 20.800 usec  
DE 6.50 usec  
TE 295.9 K  
D1 2.00000000 sec  
D11 0.03000000 sec

==== CHANNEL f1 =====  
NUC1 13C  
P1 9.00 usec  
PLW1 53.48799896 W  
SFO1 100.6253441 MHz

==== CHANNEL f2 =====  
CPDPRG2 waltz16  
NUC2 1H  
PCPD2 90.00 usec  
PLW2 12.22599983 W  
PLW12 0.28864691 W  
PLW13 0.14466980 W  
SFO2 400.1416006 MHz

F2 - Processing parameters  
SI 32768  
SF 100.6152890 MHz  
WDW EM  
SSB 0  
LB 1.00 Hz  
GB 0  
PC 1.40

8.403  
8.109  
8.086  
7.835  
7.829  
7.372  
7.366  
7.350  
7.343  
6.237  
6.221  
6.205  
5.079  
4.896  
4.622  
4.405  
4.398  
4.390  
3.949  
3.941  
3.812  
3.804  
3.763  
3.754  
3.724  
3.367  
3.337  
3.333  
3.329  
3.325  
3.321  
3.274  
3.255  
3.237  
2.309  
2.303  
2.235  
2.218  
1.405  
1.399  
1.386  
1.382  
1.368  
0.021

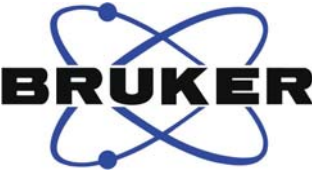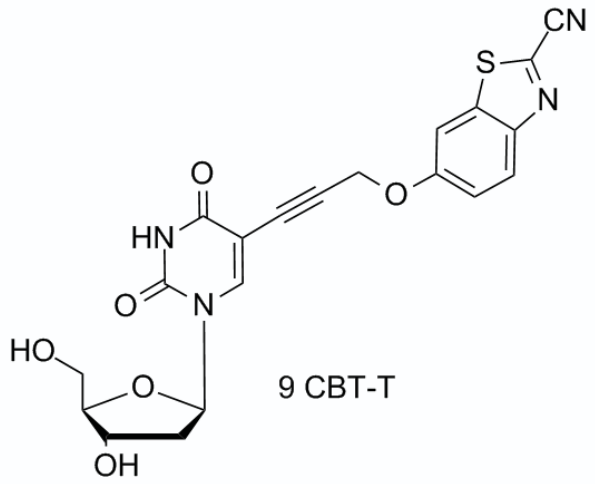

Current Data Parameters  
NAME DCF-IV-21  
EXPNO 1  
PROCNO 1

F2 - Acquisition Parameters  
Date\_ 20110219  
Time 15.14  
INSTRUM spect  
PROBHD 5 mm PABBO BB-  
PULPROG zg30  
TD 65536  
SOLVENT MeOD  
NS 16  
DS 2  
SWH 8223.685 Hz  
FIDRES 0.125483 Hz  
AQ 3.9846387 sec  
RG 32  
DW 60.800 usec  
DE 6.50 usec  
TE 296.1 K  
D1 1.00000000 sec

==== CHANNEL f1 =====  
NUC1 1H  
P1 14.00 usec  
PLW1 12.22599983 W  
SFO1 400.1424710 MHz

F2 - Processing parameters  
SI 65536  
SF 400.1400000 MHz  
WDW EM  
SSB 0  
LB 0.30 Hz  
GB 0  
PC 1.00

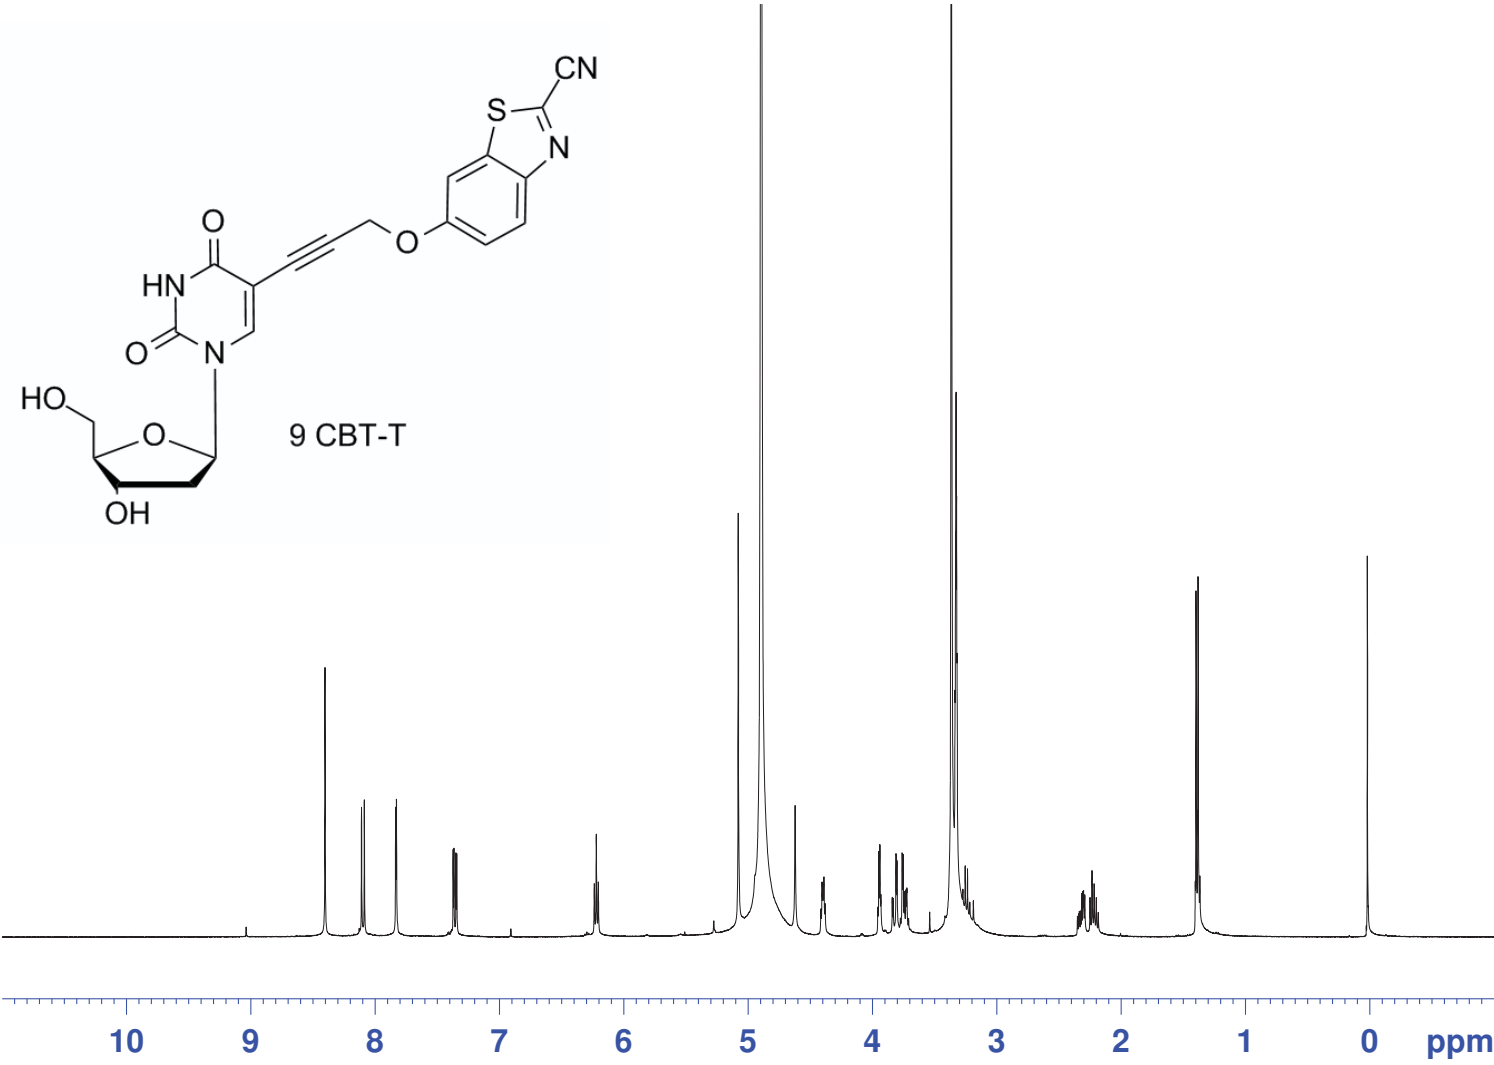

1.00  
1.03  
0.96  
1.01  
1.02  
1.99  
1.12  
1.06  
0.96  
1.06  
1.30  
13.66  
5.32  
1.00  
1.24  
2.60

dcf-IV-21-C13



164.32  
159.89  
151.08  
148.44  
146.36  
138.80  
135.57  
126.48  
120.30  
114.17  
106.35  
99.17  
89.18  
88.43  
87.15  
80.55  
71.84  
62.46  
58.12  
55.78  
49.85  
49.64  
49.43  
49.21  
49.00  
48.79  
48.57  
48.36  
41.79

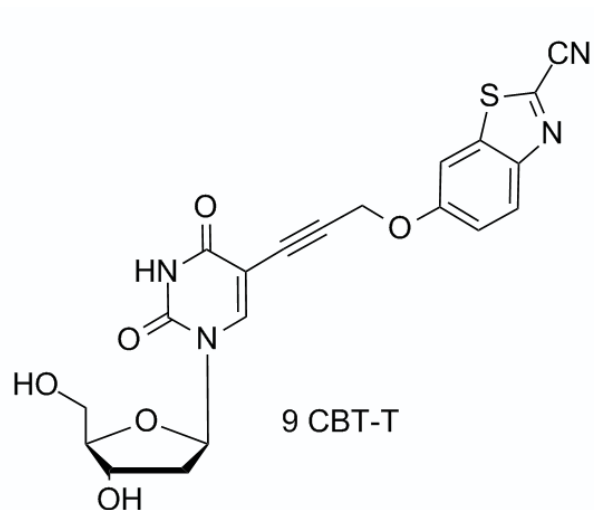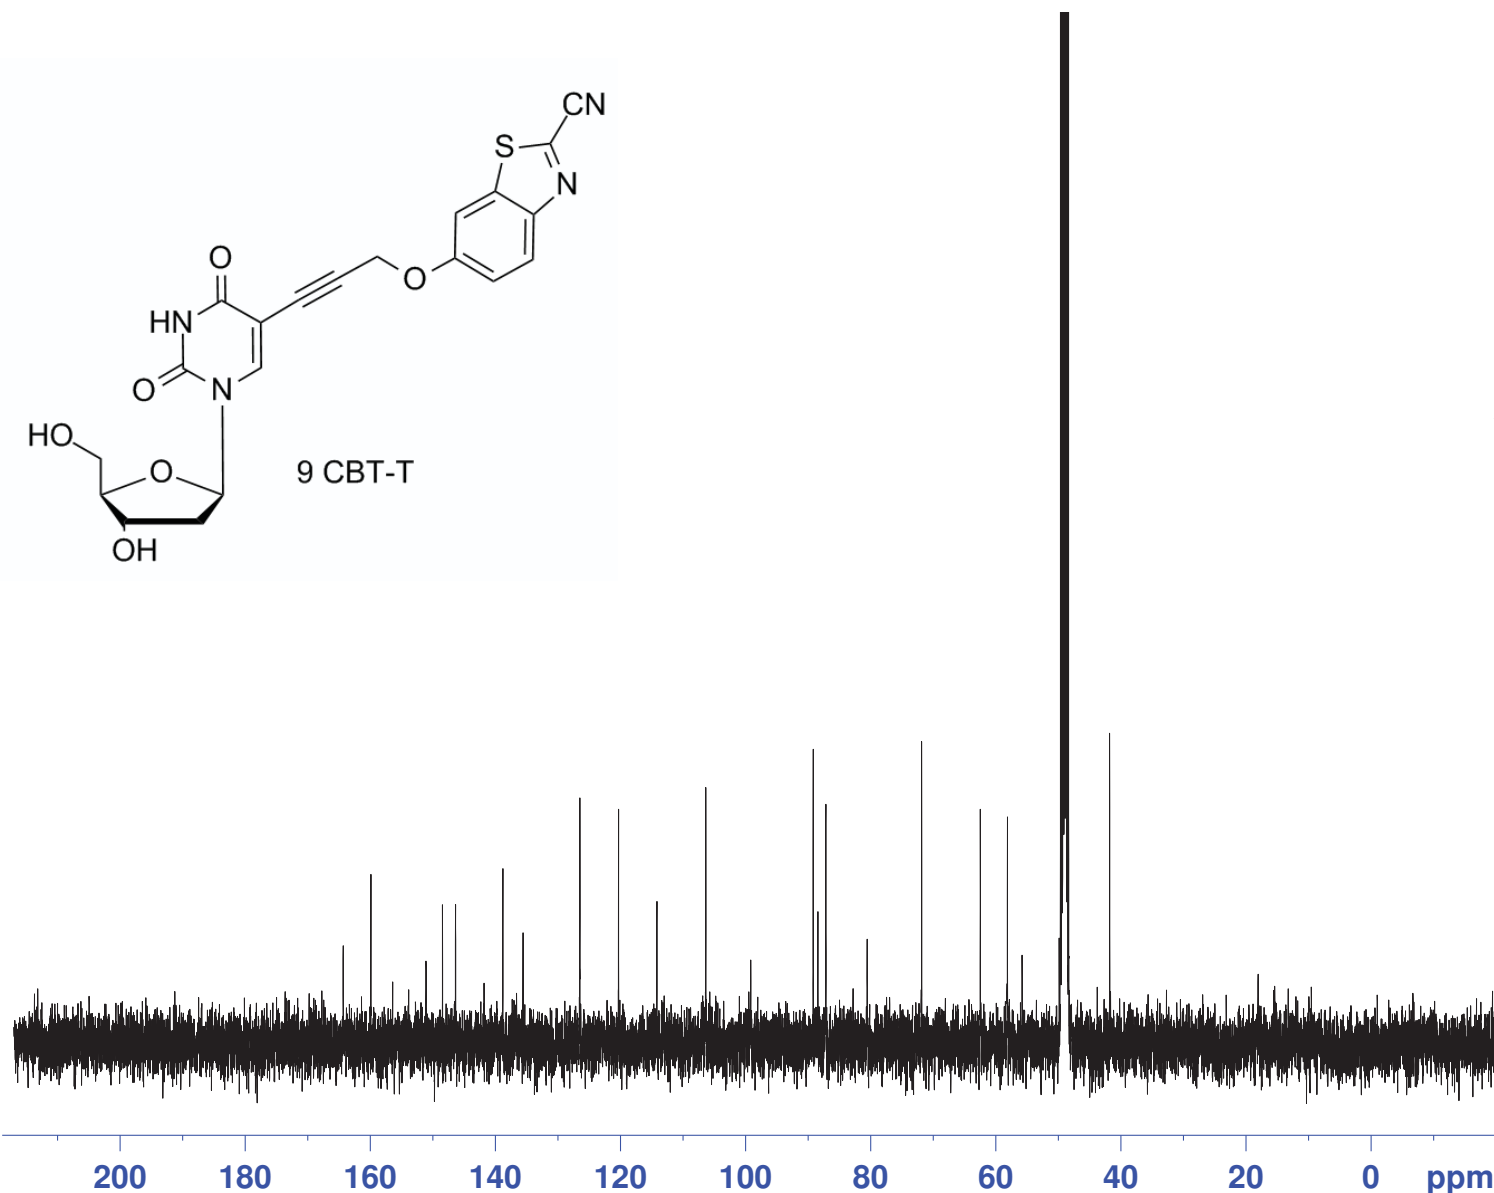

Current Data Parameters  
NAME dcf-IV-21-C13  
EXPNO 2  
PROCNO 1

F2 - Acquisition Parameters  
Date\_ 20120124  
Time 10.05  
INSTRUM spect  
PROBHD 5 mm PABBO BB-  
PULPROG zgpg30  
TD 65536  
SOLVENT CDCl3  
NS 423  
DS 4  
SWH 24038.461 Hz  
FIDRES 0.366798 Hz  
AQ 1.3631988 sec  
RG 203  
DW 20.800 usec  
DE 6.50 usec  
TE 298.3 K  
D1 2.00000000 sec  
D11 0.03000000 sec

==== CHANNEL f1 =====  
NUC1 13C  
P1 9.00 usec  
PLW1 62.00000000 W  
SFO1 100.6253441 MHz

==== CHANNEL f2 =====  
CPDPRG2 waltz16  
NUC2 1H  
PCPD2 90.00 usec  
PLW2 16.00000000 W  
PLW12 0.36000001 W  
PLW13 0.29159999 W  
SFO2 400.1416006 MHz

F2 - Processing parameters  
SI 32768  
SF 100.6155389 MHz  
WDW EM  
SSB 0  
LB 1.00 Hz  
GB 0  
PC 1.40

dcf-IV-45-pure-H1

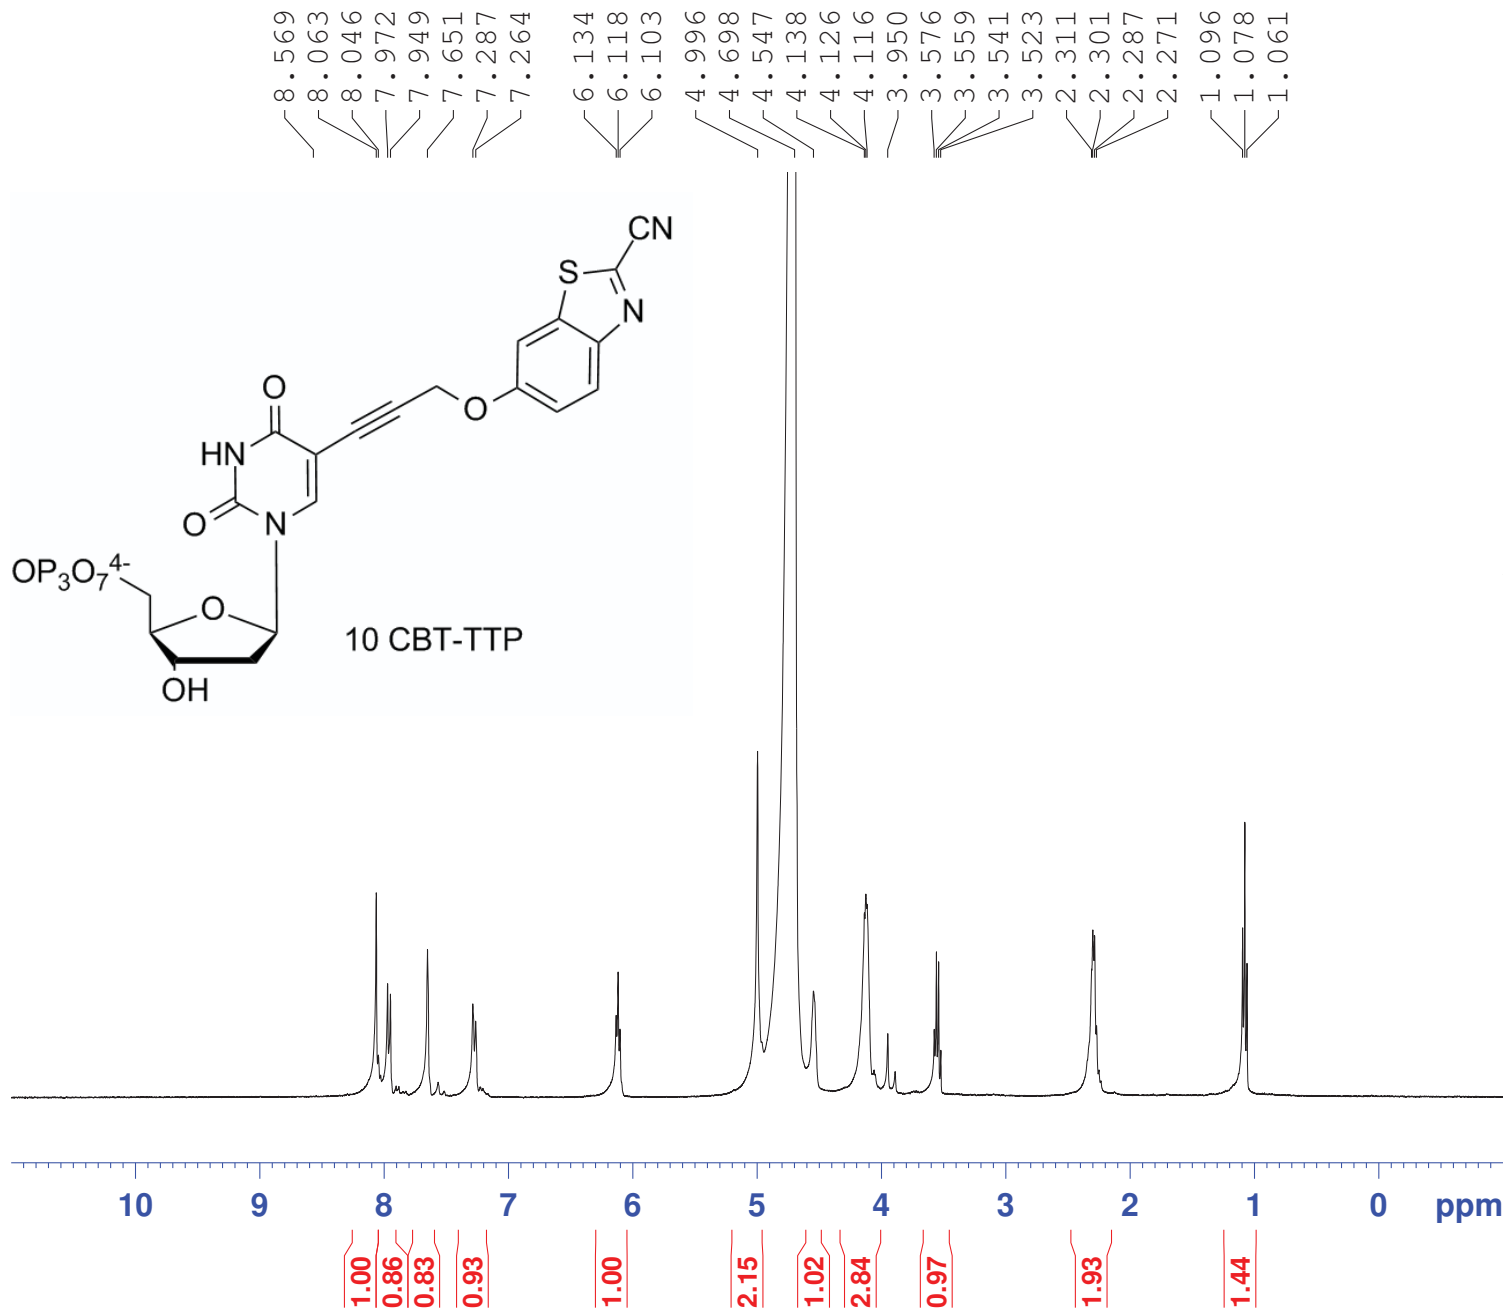

Current Data Parameters  
NAME dcf-IV-45-pure  
EXPNO 3  
PROCNO 1

F2 - Acquisition Parameters  
Date\_ 20110523  
Time 18.59  
INSTRUM spect  
PROBHD 5 mm PABBO BB-  
PULPROG zg30  
TD 65536  
SOLVENT D2O  
NS 100  
DS 2  
SWH 8223.685 Hz  
FIDRES 0.125483 Hz  
AQ 3.9846387 sec  
RG 128  
DW 60.800 usec  
DE 6.50 usec  
TE 296.8 K  
D1 1.00000000 sec

===== CHANNEL f1 =====  
NUC1 1H  
P1 13.50 usec  
PLW1 16.00000000 W  
SFO1 400.1424710 MHz

F2 - Processing parameters  
SI 65536  
SF 400.1400000 MHz  
WDW EM  
SSB 0  
LB 0.30 Hz  
GB 0  
PC 1.00

dcf-IV-45-C13

158.46  
151.46  
147.07  
146.03  
138.09  
135.73  
125.70  
119.92  
113.92  
106.22  
99.20  
88.99  
86.53  
86.35  
86.27  
79.49  
70.82  
65.82  
58.12  
57.99  
39.34  
17.47

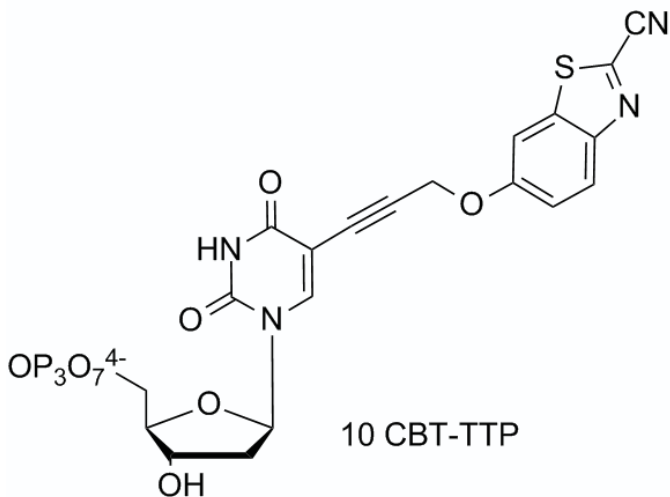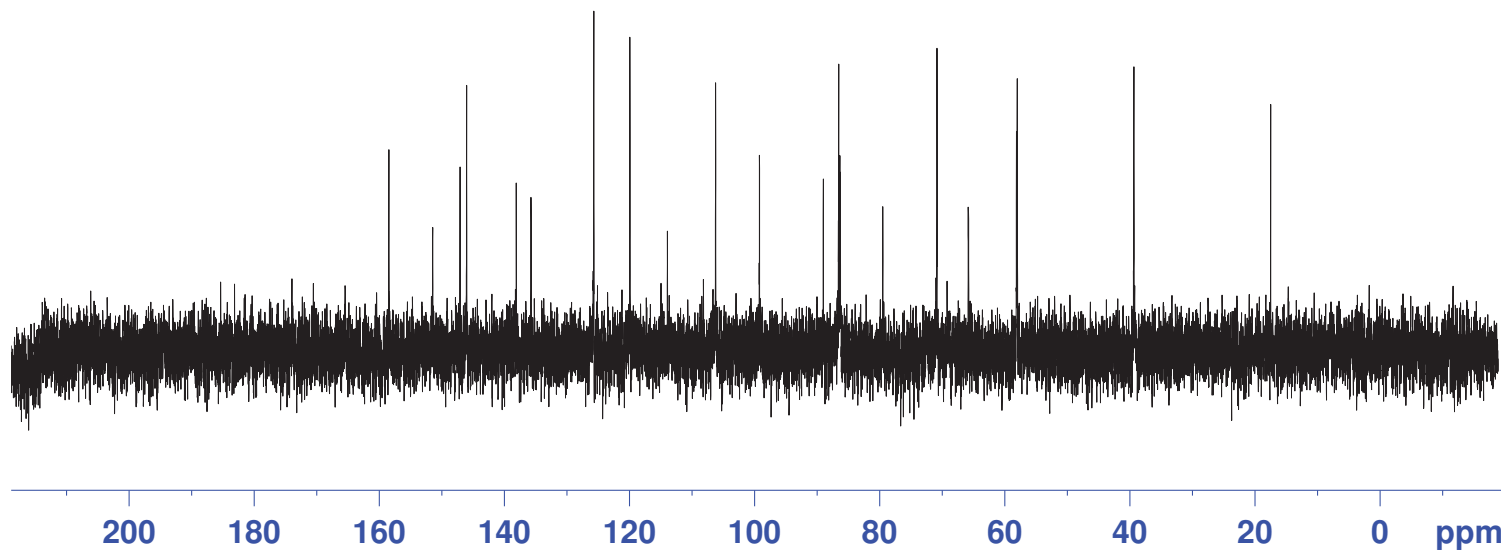

Current Data Parameters  
NAME dcf-IV-45-C13  
EXPNO 1  
PROCNO 1

F2 - Acquisition Parameters  
Date\_ 20110523  
Time 21.33  
INSTRUM spect  
PROBHD 5 mm PABBO BB-  
PULPROG zgpg30  
TD 65536  
SOLVENT D2O  
NS 11000  
DS 4  
SWH 24038.461 Hz  
FIDRES 0.366798 Hz  
AQ 1.3631988 sec  
RG 203  
DW 20.800 usec  
DE 6.50 usec  
TE 297.3 K  
D1 2.00000000 sec  
D11 0.03000000 sec

==== CHANNEL f1 =====  
NUC1 13C  
P1 9.00 usec  
PLW1 62.00000000 W  
SFO1 100.6253445 MHz

==== CHANNEL f2 =====  
CPDPRG2 waltz16  
NUC2 1H  
PCPD2 90.00 usec  
PLW2 16.00000000 W  
PLW12 0.36000001 W  
PLW13 0.29159999 W  
SFO2 400.1416006 MHz

F2 - Processing parameters  
SI 32768  
SF 100.6152207 MHz  
WDW EM  
SSB 0  
LB 1.00 Hz  
GB 0  
PC 1.40

dcf-IV-45-P31

-10.85  
-10.98  
-11.49  
-11.60

-23.35

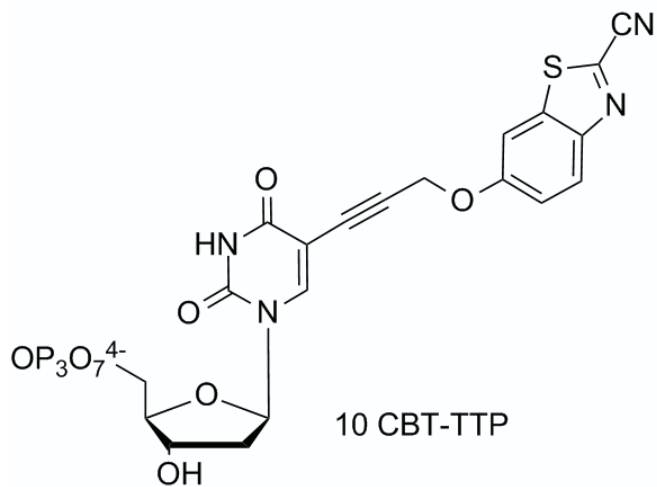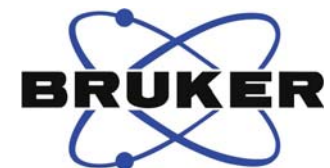

Current Data Parameters  
NAME dcf-IV-45  
EXPNO 2  
PROCNO 1

F2 - Acquisition Parameters  
Date\_ 20110522  
Time 14.47  
INSTRUM spect  
PROBHD 5 mm PABBO BB-  
PULPROG zg30  
TD 65536  
SOLVENT D2O  
NS 32  
DS 4  
SWH 64102.563 Hz  
FIDRES 0.978127 Hz  
AQ 0.5112308 sec  
RG 203  
DW 7.800 usec  
DE 6.50 usec  
TE 296.5 K  
D1 2.00000000 sec

==== CHANNEL f1 =====  
NUC1 31P  
P1 14.00 usec  
PLW1 12.5000000 W  
SFO1 161.9816417 MHz

F2 - Processing parameters  
SI 32768  
SF 161.9796410 MHz  
WDW EM  
SSB 0  
LB 1.00 Hz  
GB 0  
PC 1.40

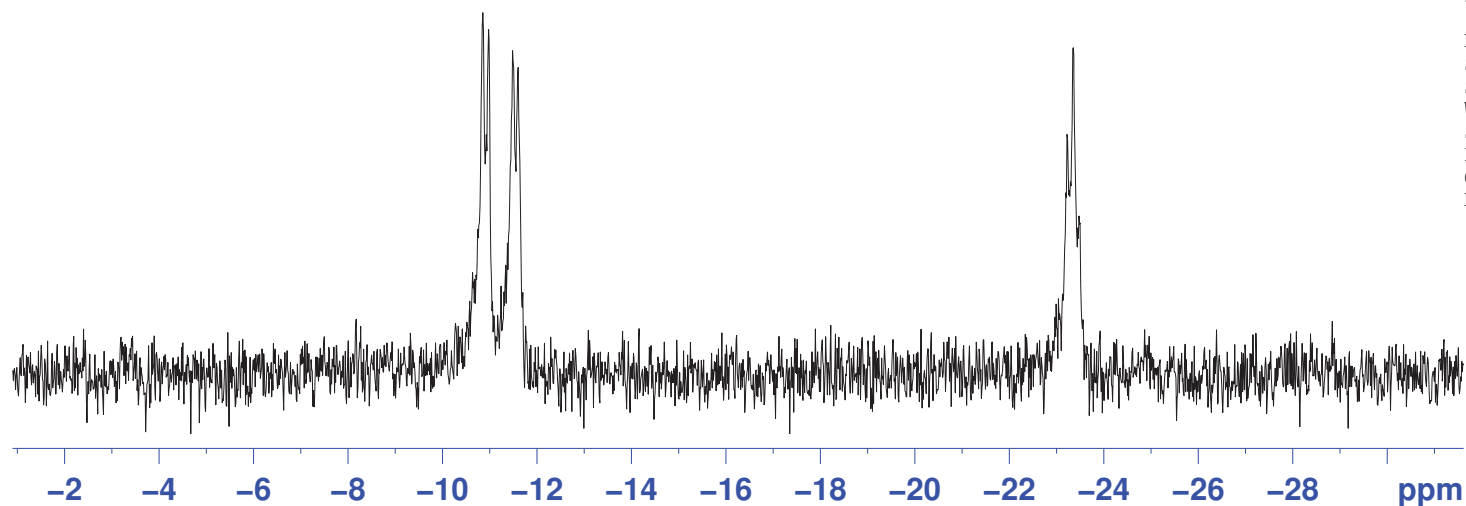



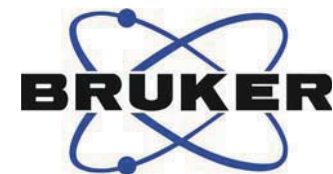

Current Data Parameters  
NAME JC-VI-83  
EXPNO 1  
PROCNO 1

F2 - Acquisition Parameters  
Date\_ 20110413  
Time 16.18  
INSTRUM spect  
PROBHD 5 mm PABBO BB-  
PULPROG zg30  
TD 65536  
SOLVENT CDCl3  
NS 2  
DS 2  
SWH 8223.685 Hz  
FIDRES 0.125483 Hz  
AQ 3.9846387 sec  
RG 10  
DW 60.800 usec  
DE 6.50 usec  
TE 296.3 K  
D1 1.00000000 sec

===== CHANNEL f1 =====  
NUC1 1H  
P1 13.50 usec  
PLW1 16.0000000 W  
SFO1 400.1420007 MHz

F2 - Processing parameters  
SI 65536  
SF 400.1399452 MHz  
WDW EM  
SSB 0  
LB 0.30 Hz  
GB 0  
PC 1.00

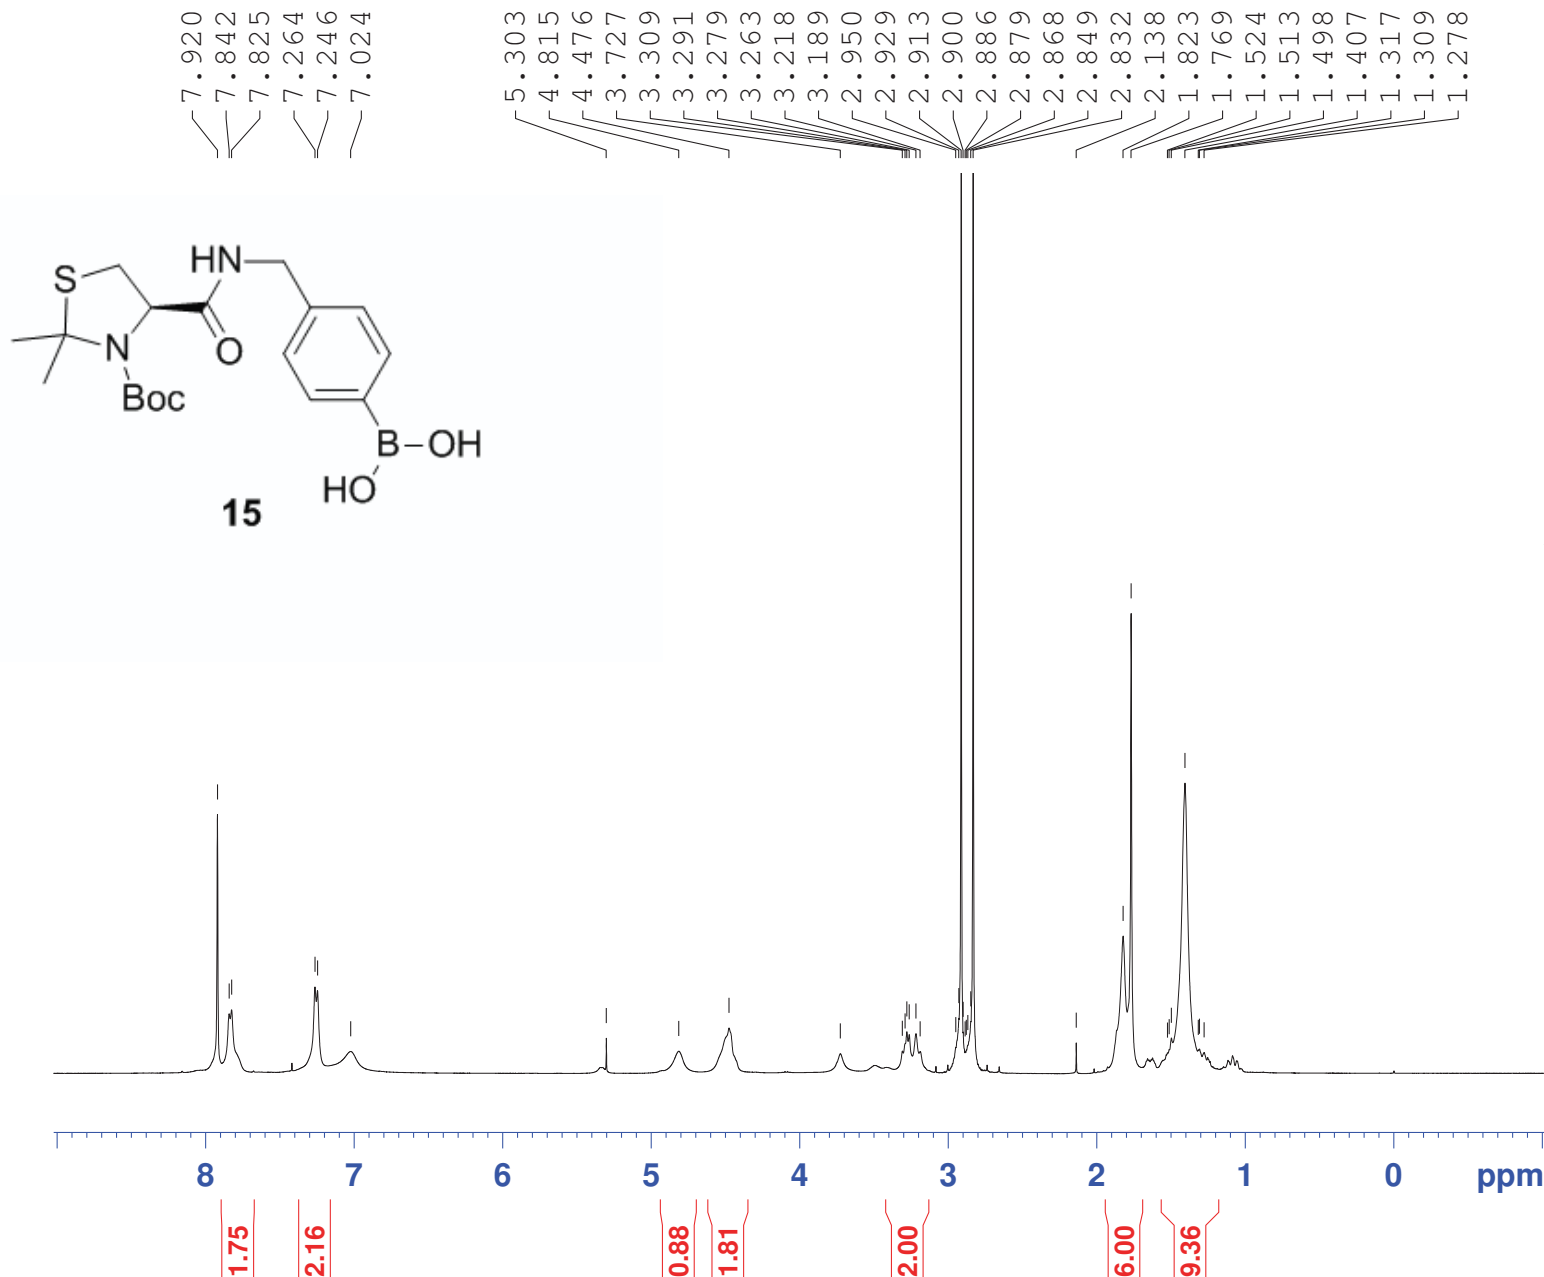



Current Data Parameters  
NAME JC-VI-83-3  
EXPNO 1  
PROCNO 1

F2 - Acquisition Parameters  
Date\_ 20110418  
Time 17.03  
INSTRUM spect  
PROBHD 5 mm PABBO BB-  
PULPROG zg30  
TD 65536  
SOLVENT MeOD  
NS 16  
DS 2  
SWH 8223.685 Hz  
FIDRES 0.125483 Hz  
AQ 3.9846387 sec  
RG 16  
DW 60.800 usec  
DE 6.50 usec  
TE 297.0 K  
D1 1.00000000 sec

===== CHANNEL f1 =====  
NUC1 1H  
P1 13.50 usec  
PLW1 16.00000000 W  
SFO1 400.1424008 MHz

F2 - Processing parameters  
SI 65536  
SF 400.1400000 MHz  
WDW EM  
SSB 0  
LB 0.30 Hz  
GB 0  
PC 1.00

7.667  
7.657  
7.255  
7.244

5.409

4.401  
4.394  
4.381  
4.087  
4.078  
3.018  
2.996  
2.987  
2.898  
2.892  
2.780  
2.773

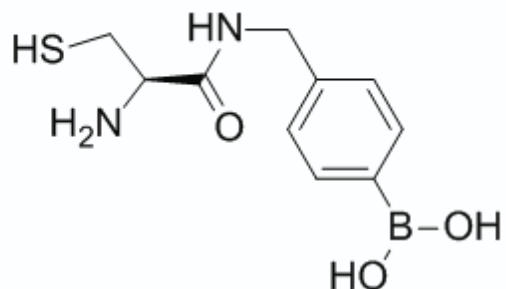

16 (Cys-BA)

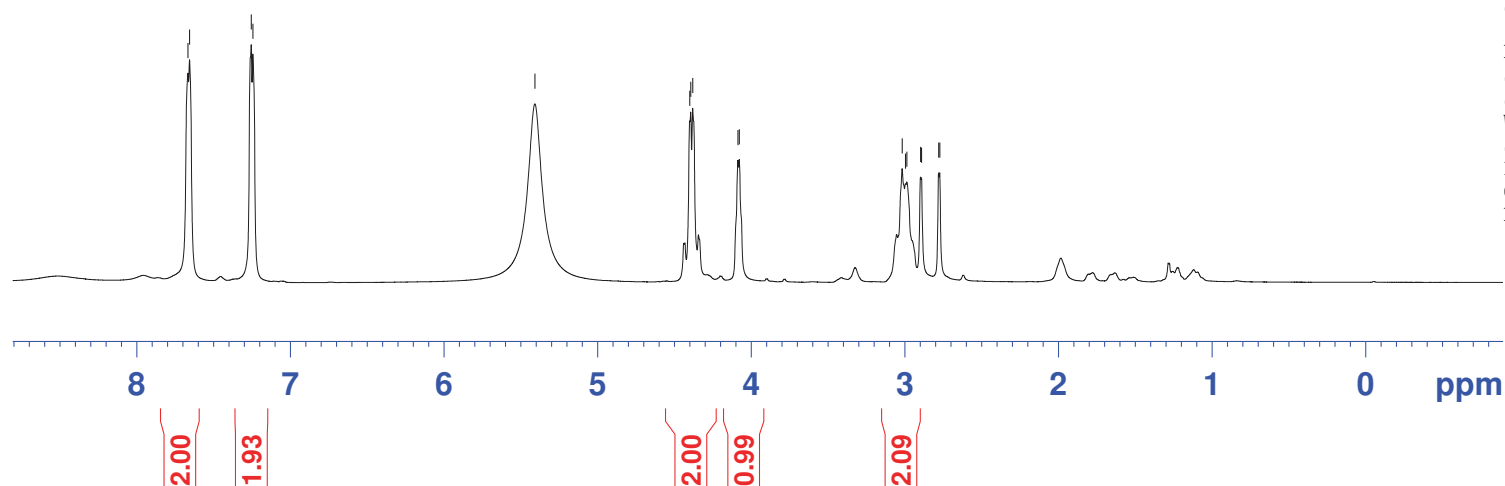



Current Data Parameters  
NAME JC-VI-83-3  
EXPNO 3  
PROCNO 1

F2 - Acquisition Parameters  
Date\_ 20110418  
Time 17.57  
INSTRUM spect  
PROBHD 5 mm PABBO BB-  
PULPROG jmod  
TD 65536  
SOLVENT MeOD  
NS 33  
DS 4  
SWH 24038.461 Hz  
FIDRES 0.366798 Hz  
AQ 1.3631988 sec  
RG 203  
DW 20.800 usec  
DE 6.50 usec  
TE 297.2 K  
CNST2 145.0000000  
CNST11 1.0000000  
D1 2.00000000 sec  
D20 0.00689655 sec

=====  
CHANNEL f1  
NUC1 13C  
P1 9.00 usec  
P2 18.00 usec  
PLW1 62.00000000 W  
SFO1 100.6238353 MHz

=====  
CHANNEL f2  
CPDPRG2 waltz16  
NUC2 1H  
PCPD2 90.00 usec  
PLW2 16.00000000 W  
PLW12 0.36000001 W  
SFO2 400.1416006 MHz

F2 - Processing parameters  
SI 32768  
SF 100.6151715 MHz  
WDW EM  
SSB 0  
LB 1.00 Hz  
GB 0  
PC 1.40

168.23

140.69

134.93

127.60

55.81

44.19

26.12

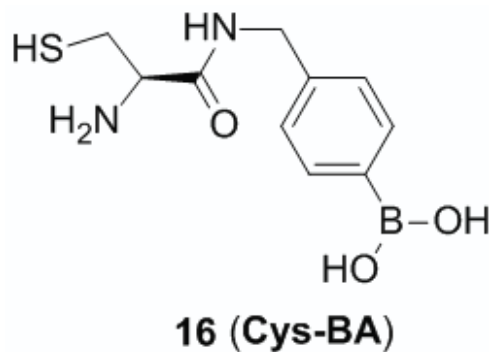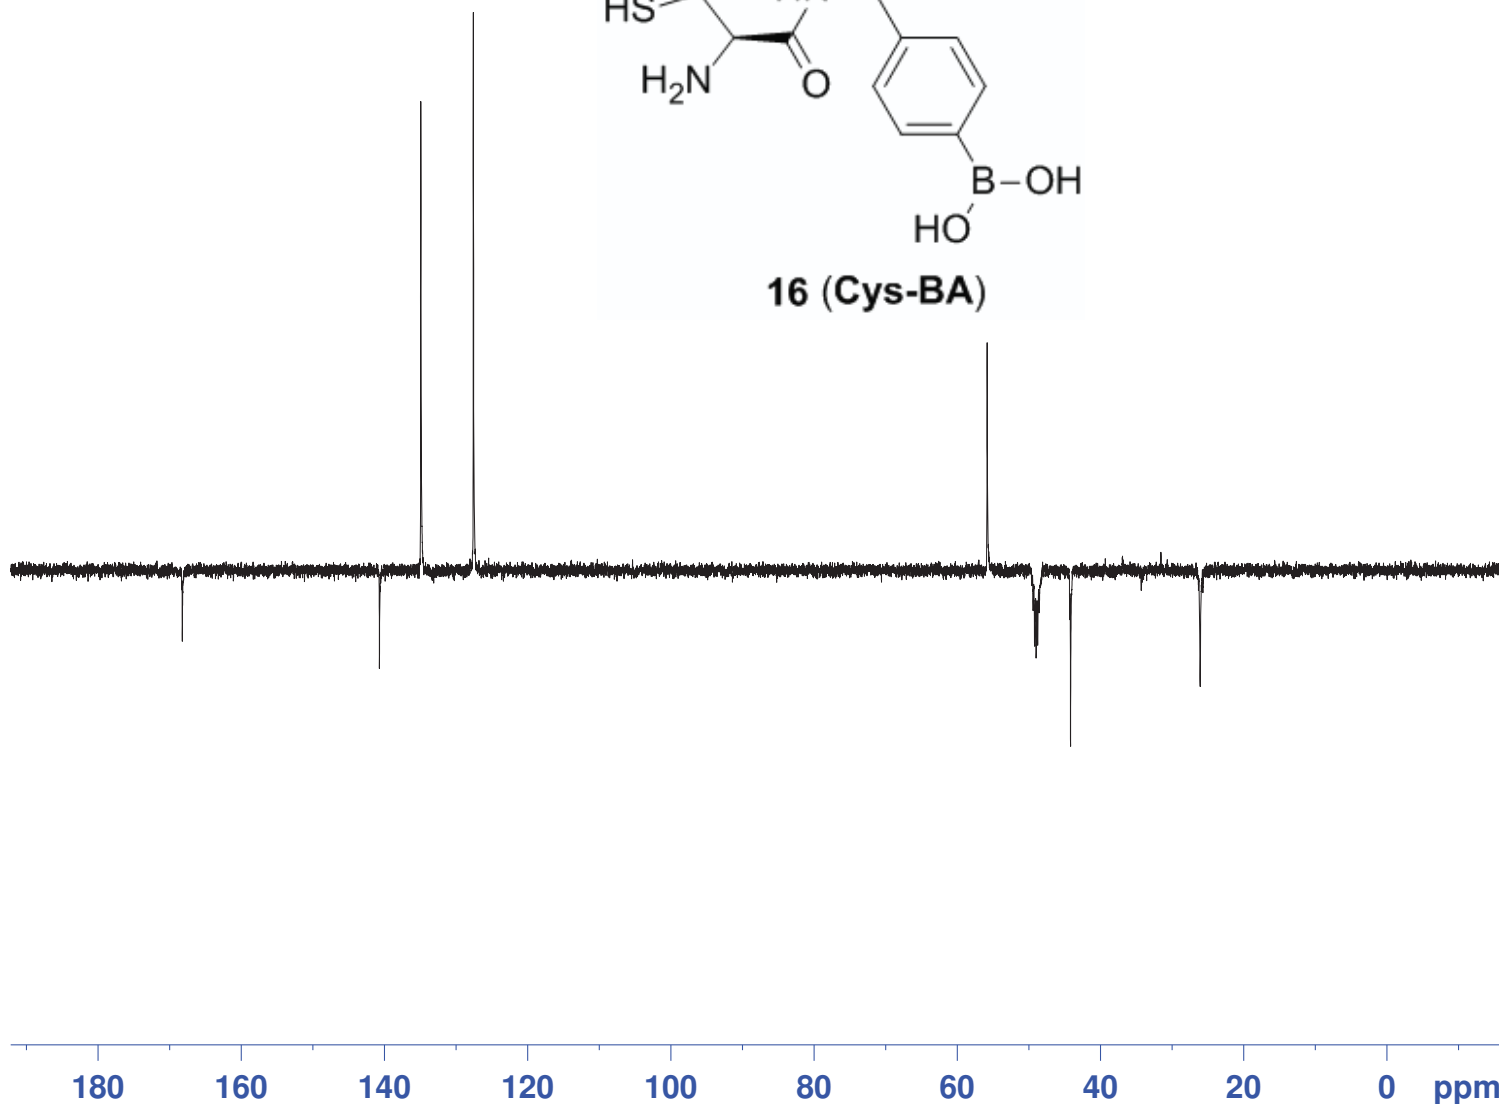

Supplement: NIHMS521642-supplement-Supporting_Information.pdf [file NIHMS521642-supplement-Supporting_Information.pdf]
